# Supplementary material for: Disinfection Byproducts in Drinking Water from the Tap: Variability in Household Calculated Additive Toxicity (CAT)
Source: PubMed Central journal article supplement — ACS ES T Water. 2024 Jul 22;4(8):3532–9. doi: 10.1021/acsestwater.4c00392 (PMC11320572; doi:10.1021/acsestwater.4c00392), 2024-07-22
Supplement: ew4c00392_si_001.pdf [file ew4c00392_si_001.pdf]

Supporting Information for

**Disinfection By-Products in Drinking Water from the Tap:  
Variability in Household Calculated Additive Toxicity (CAT)**

Berkley N. Anderson, Gabrielle P. Black<sup>†</sup>, and Thomas M. Young\*

*Department of Civil and Environmental Engineering  
University of California, One Shields Ave., Davis, CA 95616*

Submitted to:  
***ACS ES&T Water***

<sup>†</sup>Present address: California Water Science Center, US Geological Survey, Sacramento, CA

\*Corresponding author: [tyoung@ucdavis.edu](mailto:tyoung@ucdavis.edu); 530-754-9399

## TABLE OF CONTENTS

|                                                                                                                |    |
|----------------------------------------------------------------------------------------------------------------|----|
| <b>Abbreviations</b> .....                                                                                     | 1  |
| <b>Table S1:</b> Targeted Disinfection By-Product Compounds .....                                              | 2  |
| <b>Section S1:</b> Additional Information for Studied Public Water Systems .....                               | 3  |
| <b>Table S2:</b> Overview of Public Water Systems .....                                                        | 3  |
| <b>Figure S1:</b> Map of Studied Public Water Systems .....                                                    | 4  |
| <b>Figure S2:</b> Household Sampling Locations .....                                                           | 5  |
| <b>Section S2:</b> Additional Information for Analytical Methods .....                                         | 6  |
| <b>Section S2.1:</b> Methodological Limitations .....                                                          | 6  |
| <b>Section S2.2:</b> Materials and Reagents .....                                                              | 7  |
| <b>Section S2.3:</b> Extraction Methods .....                                                                  | 7  |
| <b>Section S2.4:</b> Overview of GC–ECD Methods .....                                                          | 8  |
| <b>Section S2.5:</b> Overview of GC–MS Methods .....                                                           | 10 |
| <b>Section S2.6:</b> Limits of Detection and Quality Controls .....                                            | 12 |
| <b>Table S3:</b> GC–ECD Retention Times (RTs) .....                                                            | 13 |
| <b>Table S4:</b> GC–MS Retention Times (RTs), Quantifiers, and Qualifiers .....                                | 13 |
| <b>Table S5:</b> LODs, LOQs, Cal Curve Accuracies, and Quality Control RSDs .....                              | 14 |
| <b>Section S2.7:</b> Compound Toxicity Potencies .....                                                         | 15 |
| <b>Table S6:</b> Compound Toxicity Potencies and Molecular Weights (MW) .....                                  | 15 |
| <b>Section S3:</b> Additional Information for Results .....                                                    | 16 |
| <b>Table S7:</b> Overview of Detection Frequencies .....                                                       | 16 |
| <b>Section S3.1:</b> Water Utility Reported vs. Measured Regulated THM <sub>4</sub> and HAA <sub>5</sub> ..... | 17 |
| <b>Table S8:</b> Water Utility Reported vs. Measured Regulated THM <sub>4</sub> and HAA <sub>5</sub> .....     | 17 |
| <b>Section S3.2:</b> Trends in DBP Concentrations by Source Water Type .....                                   | 18 |
| <b>Section S3.3:</b> Comparisons of CAT across Endpoints and Variables (Figures S3-S8) .....                   | 20 |

|                                                                                                |    |
|------------------------------------------------------------------------------------------------|----|
| <b>Section S3.4:</b> Regulated vs. Unregulated Concentrations Predictive Models.....           | 23 |
| <b>Table S9:</b> Regulated vs. Unregulated Concentrations Model Strengths.....                 | 23 |
| <b>Figure S9:</b> Regulated vs. Unregulated Concentrations by Source and Season .....          | 24 |
| <b>Section S3.5:</b> Regulated vs. Unregulated Concentrations Figures (S10-S17).....           | 25 |
| <b>Section S3.6:</b> Regulated vs. Unregulated CAT Predictive Models .....                     | 28 |
| <b>Figure S18:</b> Regulated vs. Unregulated CAT Models for AREc32 and CHO Endpoints .....     | 28 |
| <b>Table S10:</b> Regulated vs. Unregulated AREc32 Oxidative Stress Model Strengths.....       | 29 |
| <b>Table S11:</b> Regulated vs. Unregulated CHO Cytotoxicity Model Strengths .....             | 30 |
| <b>Figure S19:</b> Regulated vs. Unregulated AREc32 Oxidative Stress by Source and Season...30 |    |
| <b>Section S3.7:</b> Regulated vs. Unregulated AREc32 Oxidative Stress (Figures S20-S27).....  | 31 |
| <b>Section S3.8:</b> Regulated vs. Unregulated CHO Cytotoxicity (Figures S28-S35) .....        | 34 |
| <b>References</b> .....                                                                        | 37 |

## Abbreviations

|       |                                        |        |                                         |
|-------|----------------------------------------|--------|-----------------------------------------|
| AWWA  | American Water Works Association       | IR     | Irvine                                  |
| BAA   | Bromoacetic Acid                       | LA     | Los Angeles                             |
| BAN   | Bromoacetonitrile                      | LC     | Lethal Concentration                    |
| BCAA  | Bromochloroacetic Acid                 | LLE    | Liquid–Liquid Extraction                |
| BCAN  | Bromochloroacetonitrile                | LOD    | Limit of Detection                      |
| BCIM  | Bromochloroiodomethane                 | LOQ    | Limit of Quantification                 |
| BDCAA | Bromodichloroacetic Acid               | LRAA   | Locational Running Annual Average       |
| BDCM  | Bromodichloromethane                   | LSW    | Large Surface Water                     |
| CAA   | Chloroacetic Acid                      | MC     | Merced                                  |
| CAT   | Calculated Additive Toxicity           | MCL    | Maximum Contaminant Level               |
| CDBAA | Chlorodibromoacetic Acid               | MD     | Madera                                  |
| CDIM  | Chlorodiiodomethane                    | MS     | Mass Spectrometry                       |
| CHO   | Chinese Hamster Ovary                  | MTBE   | Methyl Tert–Butyl Ether                 |
| CI    | Confidence Interval                    | MW     | Molecular Weight                        |
| CIAA  | Chloroiodoacetic Acid                  | MW     | Mixed Water                             |
| CL    | Chlorination                           | MWD    | Metropolitan Water District             |
| cld   | Compact Letter Display                 | ND     | Not Detected                            |
| CLM   | Chloramination                         | NOM    | Natural Organic Matter                  |
| CV    | Coefficient of Variation               | OS     | Oxidative Stress                        |
| DBAA  | Dibromoacetic Acid                     | PDMS   | Polydimethylsiloxane                    |
| DBAN  | Dibromoacetonitrile                    | Q1     | First Quartile                          |
| DBP   | Disinfection By-Product                | Q2     | Second Quartile                         |
| DCAA  | Dichloroacetic Acid                    | Q3     | Third Quartile                          |
| df    | Degrees of Freedom                     | QC     | Quality Control                         |
| EB    | East Bay                               | S      | Summer                                  |
| EC    | Effect Concentration                   | SM     | San Mateo                               |
| ECD   | Electron Capture Detector              | SSW    | Small Surface Water                     |
| EPA   | U.S. Environmental Protection Agency   | TBAA   | Tribromoacetic Acid                     |
| GC    | Gas Chromatography                     | TBM    | Tribromomethane                         |
| GW    | Groundwater                            | TCAA   | Trichloroacetic Acid                    |
| HAN   | Haloacetonitrile                       | TCM    | Trichloromethane                        |
| HK    | Haloketones                            | TFSPME | Thin–Filmed Solid–Phase Microextraction |
| HLB   | Hydrophilic Lipophilic Balanced        | THM    | Trihalomethane                          |
| IAA   | Iodoacetic Acid                        | W      | Winter                                  |
| IAN   | Iodoacetonitrile                       | WHO    | World Health Organization               |
| IDSE  | Initial Distribution System Evaluation | WV     | Weaverville                             |
| IQR   | Interquartile Range                    | YT     | Yurok Tribe                             |

**Table S1: Targeted Disinfection By-Product Compounds**

| Class             | Compound                 | Abv.  | CAS no.    | SMILES              | Vendor                            | Purity |
|-------------------|--------------------------|-------|------------|---------------------|-----------------------------------|--------|
| THM <sub>4</sub>  | Trichloromethane         | TCM   | 67-66-3    | C(Cl)(Cl)Cl         | EPA 551A Mix, Sigma <sup>a</sup>  | –      |
|                   | Bromodichloromethane     | BDCM  | 75-27-4    | C(Cl)(Cl)Br         | EPA 551A Mix, Sigma <sup>a</sup>  | –      |
|                   | Dibromochloromethane     | DBCM  | 124-48-1   | C(Cl)(Br)Br         | EPA 551A Mix, Sigma <sup>a</sup>  | –      |
|                   | Tribromomethane          | TBM   | 75-25-2    | C(Br)(Br)Br         | EPA 551A Mix, Sigma <sup>a</sup>  | –      |
| THM <sub>UR</sub> | Bromochloriodomethane    | BCIM  | 34970-00-8 | C(Cl)(Br)I          | TRC <sup>b</sup>                  | 97.0%  |
|                   | Chlorodiodomethane       | CDIM  | 638-73-3   | C(Cl)(I)I           | TRC <sup>b</sup>                  | 95.0%  |
| HAA <sub>5</sub>  | Chloroacetic Acid        | CAA   | 79-11-8    | C(C(=O)O)Cl         | EPA 552.2 Mix, Sigma <sup>a</sup> | –      |
|                   | Dichloroacetic Acid      | DCAA  | 79-43-6    | C(C(=O)O)(Cl)Cl     | EPA 552.2 Mix, Sigma <sup>a</sup> | –      |
|                   | Trichloroacetic Acid     | TCAA  | 76-03-9    | C(=O)(C(Cl)(Cl)Cl)O | EPA 552.2 Mix, Sigma <sup>a</sup> | –      |
|                   | Bromoacetic Acid         | BAA   | 79-08-3    | C(C(=O)O)Br         | EPA 552.2 Mix, Sigma <sup>a</sup> | –      |
|                   | Dibromoacetic Acid       | DBAA  | 631-64-1   | C(C(=O)O)(Br)Br     | EPA 552.2 Mix, Sigma <sup>a</sup> | –      |
| HAA <sub>UR</sub> | Bromochloroacetic Acid   | BCAA  | 5589-96-8  | C(C(=O)O)(Cl)Br     | EPA 552.2 Mix, Sigma <sup>a</sup> | –      |
|                   | Bromodichloroacetic Acid | BDCAA | 71133-14-7 | C(=O)(C(Cl)(Cl)Br)O | EPA 552.2 Mix, Sigma <sup>a</sup> | –      |
|                   | Chlorodibromoacetic Acid | CDBAA | 5278-95-5  | C(=O)(C(Cl)(Br)Br)O | EPA 552.2 Mix, Sigma <sup>a</sup> | –      |
|                   | Tribromoacetic Acid      | TBAA  | 75-96-7    | C(=O)(C(Br)(Br)Br)O | EPA 552.2 Mix, Sigma <sup>a</sup> | –      |
|                   | Iodoacetic Acid          | IAA   | 64-69-7    | C(C(=O)O)I          | TRC <sup>b</sup>                  | 98.0%  |
|                   | Chloriodoacetic Acid     | CIAA  | 53715-09-6 | C(C(=O)O)(Cl)I      | TRC <sup>b</sup>                  | 95.0%  |
| HAN               | Bromoacetonitrile        | BAN   | 590-17-0   | C(C#N)Br            | TRC <sup>b</sup>                  | 98.0%  |
|                   | Bromochloroacetonitrile  | BCAN  | 83463-62-1 | C(#N)C(Cl)Br        | TRC <sup>b</sup>                  | 90.0%  |
|                   | Dibromoacetonitrile      | DBAN  | 3252-43-5  | C(#N)C(Br)Br        | TRC <sup>b</sup>                  | 96.3%  |
|                   | Iodoacetonitrile         | IAN   | 624-75-9   | C(C#N)I             | TRC <sup>b</sup>                  | –      |

<sup>a</sup> purchased from Sigma–Aldrich<sup>b</sup> purchased from Toronto Research Chemicals

**Section S1:** Additional Information for Studied Public Water Systems

**Table S2:** Overview of Public Water Systems

| SOURCE WATER TYPE   | REGION      | WATER SYSTEM                          | POPULATION SERVED | DISINFECTION TYPE | CONSUMER CONFIDENCE REPORTS |
|---------------------|-------------|---------------------------------------|-------------------|-------------------|-----------------------------|
| Large Surface Water | San Mateo   | California Water Services, San Mateo  | 101,004           | Chloramination    | 2020                        |
|                     | East Bay    | East Bay Municipal Utility District   | 1,379,000         | Chloramination    | 2020                        |
| Small Surface Water | Weaverville | Weaverville C. S. D.                  | 3,554             | Chlorination      | 2020                        |
|                     | Yurok       | Yurok Tribal Environmental Program    | < 1,000           | Chlorination      | 2020                        |
| Mixed Water         | Los Angeles | LA City Department of Water and Power | 4,072,307         | Chloramination    | 2020                        |
|                     | Irvine      | Irvine Ranch Water District           | 450,526           | Chloramination    | 2020                        |
| Groundwater         | Madera      | City of Madera                        | 66,082            | Chlorination      | 2020                        |
|                     | Merced      | City of Merced                        | 86,750            | Chlorination      | 2020                        |

**Figure S1: Map of Studied Public Water Systems**

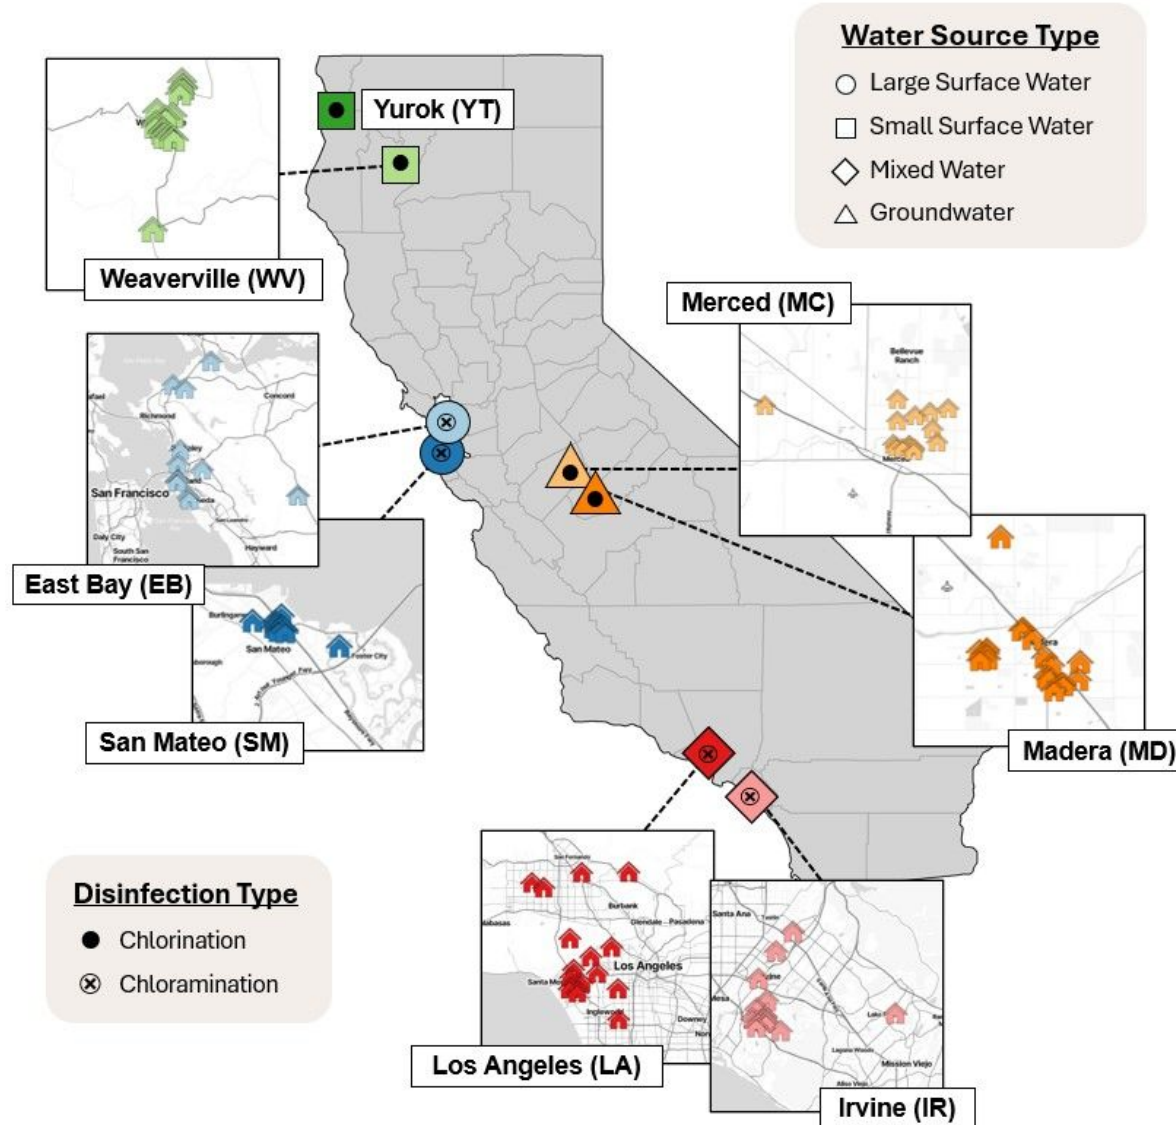

Figure S2: Household Sampling Locations

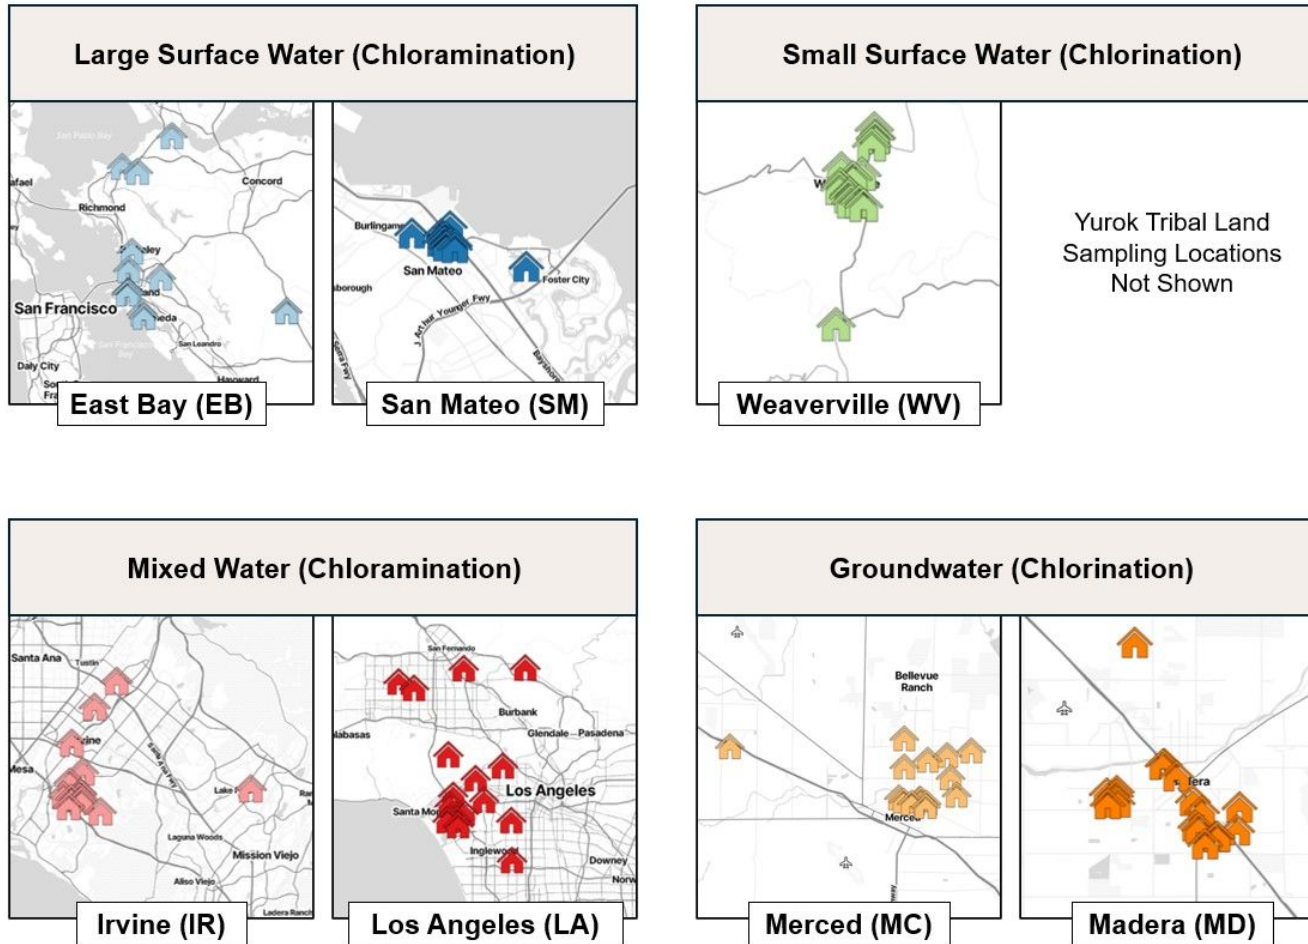



## Section S2: Additional Information for Analytical Methods

### Section S2.1: Methodological Limitations

#### 1) *Lack of use of dechlorinating agent during sample preparation:*

EPA approved methods all require the use of preservatives or dechlorinating agents such as ammonium chloride or sodium thiosulfate to prevent further reactions between disinfectants and precursors.<sup>1</sup> In this study, household tap water samples were collected by participants, transported to the UC Davis Department of Civil and Environmental Engineering, immediately cooled on ice and shipped the same day, and were analyzed using numerous methods for targeted and nontargeted chemical analysis. Use of a dechlorinating agent risked reactions that might compromise nontarget compound detection or identification, a central project goal. To assess the validity of the methods used in this study, measured regulated concentrations in each region were statistically compared with concentrations reported in water utility consumer confidence reports (CCR). A Student's t-Test revealed that measured regulated concentrations were comparable to values reported in water utility consumer confidence reports (CCR) with no statistical difference for either THM<sub>4</sub> ( $P = 0.10$ ,  $df = 7$ ) or HAA<sub>5</sub> ( $P = 0.19$ ,  $df = 6$ ). Comparable values between reported and measured regulated compound concentrations support the validity of the methods used in this study despite deviations from established methods.

#### 2) *Extended reaction times during sample processing:*

Household tap water samples were held at 4°C up to 14 days prior to extraction and thus also had extended reaction times. THM concentrations have been found to increase with residence time, forming as end products while other DBPs are intermediates.<sup>2</sup> Measured THM<sub>4</sub> concentrations averaged +9.6 µg/L more than reported values, which may be due to lack of use of a dechlorinating agent and extended reaction times. As mentioned in the previous section, a Student's t-Test revealed that measured regulated concentrations were comparable to values reported in water utility consumer confidence reports (CCR) with no statistical difference for either THM<sub>4</sub> ( $P = 0.10$ ,  $df = 7$ ) or HAA<sub>5</sub> ( $P = 0.19$ ,  $df = 6$ ). Comparable values between reported and measured regulated concentrations supports the validity of the methods used in this study despite extended reaction times.

#### 3) *Instances of chloroform extrapolation:*

Chloroform was detected in every region, but, 64% of summer detects and 41% of winter detects saturated the GC-MS detector and were beyond the linear range of the calibration curve. Due to limited sample volume, we were unable to dilute and rerun samples. While extrapolated chloroform concentrations are reported, it should be noted that these values have a high degree of uncertainty. However, chloroform is one of the least potent DBPs for all five biological endpoints and did not have a significant impact on calculated additive toxicity.

#### 4) *Inclusion of a limited set of unregulated DBPs:*

DBPs examined in this study include all currently regulated organohalogen DBPs (THM<sub>4</sub> and HAA<sub>5</sub>). However, a limited set of 12 unregulated DBPs were selected including four HANs, six additional HAAs, and two additional THMs. The DBPs included in this study account for ~21% of the DBPs in the CHO database<sup>3</sup> and ~38% in the database for the other endpoints.<sup>4</sup> While it was not feasible to include all known unregulated DBP compounds with toxicological data,

potent drivers of toxicity were selected for this study including haloacetonitriles (particularly DBAN), bromo-DBPs, and iodo-DBPs.

### **Section S2.2: Materials and Reagents**

All materials and reagents were purchased at the highest purity available. Standards were purchased from Accustandard Inc., New Haven, CT; Sigma-Aldrich, St. Louis, MO; and Toronto Research Chemicals Inc., Toronto, Ontario. All compounds and solvents used for extraction including sodium bicarbonate, sodium sulfate, acetone, hexane, methanol, methyl tert-butyl ether (MTBE), and sulfuric acid were purchased from Thermo Fisher Scientific, Waltham, MA or Sigma-Aldrich, St. Louis, MO. Carrier gas tanks for gas chromatography (GC) instruments including nitrogen, helium, and argon (5% methane) were purchased from Airgas, Radnor, PA.

### **Section S2.3: Extraction Methods**

#### *Haloacetic Acids (HAAs)*

HAA extraction methods were derived from EPA Method 552.3, however a dechlorinating agent was not used.<sup>5</sup> All HAAs were extracted using a liquid-liquid extraction (LLE) with 40 mL of sample, 4 mL of methyl tert-butyl ether (MTBE), and 18 g of sodium sulfate. Samples were acidified with sulfuric acid to ensure pH < 0.5 and derivatized by sample methylation with acidified methanol using methods outlined in EPA Method 552.3.<sup>5</sup> Extracts were then analyzed using GC-ECD (Agilent 6890) and methods outlined in Section S2.4. Results were analyzed using Agilent ChemStation Software and Microsoft Excel. Chloroacetic acid (CAA) coeluted with an unidentified compound in samples from some regions. Duplicates of all winter and summer samples were analyzed using GC-ECD and methods outlined in Section S2.4. However, an Agilent J&W DB-5MS GC column was used and the method was modified to a shorter run time to exclusively analyze CAA. HAAs were analyzed separately from THMs and HANs because HAA analysis methods using GC-ECD or GC-MS require an additional derivatization process.

#### *Trihalomethanes (THMs) and Haloacetonitriles (HANs)*

All remaining compounds including THMs and HANs were extracted using thin-film solid-phase microextraction (TF-SPME) with polydimethylsiloxane/ hydrophilic lipophilic balanced (PDMS/HLB) fibers. Preconditioned fibers were immersed in 10 mL of sample in 12 mL amber vials which were then placed in a tube rotator for 30 minutes at 30 rpm. The fibers were allowed to dry fully before being placed in thermal desorption tubes and analyzed using GC-MS (Agilent 6890) paired with an automated thermal desorption system (Markes International ULTRA-xr) and methods outlined in Section S2.5. Results were analyzed using Agilent MassHunter Quantitative Analysis Software.

## Section S2.4: Overview of GC–ECD Methods

---

---

### 6890 GC METHOD

---

---

#### OVEN

Initial temp: 40 'C (On)                      Maximum temp: 325 'C  
Initial time: 10.00 min                      Equilibration time: 3.00 min  
Ramps:  
# Rate Final temp Final time  
1 2.50 65 0.00  
2 10.00 85 0.00  
3 20.00 205 7.00  
4 0.0(Off)  
Post temp: 100 'C  
Post time: 0.00 min  
Run time: 35.00 min

#### FRONT INLET (SPLIT/SPLITLESS)                      BACK INLET (VOLATILES)

Mode: Splitless                      Mode: Split  
Initial temp: 210 'C (On)                      Initial temp: 50 'C (Off)  
Pressure: 9.17 psi (On)                      Pressure: 0.00 psi (Off)  
Purge flow: 30.0 mL/min                      Total flow: 45.0 mL/min  
Purge time: 0.75 min                      Gas saver: Off  
Total flow: 33.6 mL/min                      Gas type: Helium  
Gas saver: Off  
Gas type: Helium

#### COLUMN 1

Capillary Column  
Model Number: Agilent 222–0732LTM  
DB–1701 (G3900–63003)  
Max temperature: 300 'C  
Nominal length: 30.0 m  
Nominal diameter: 250.00 um  
Nominal film thickness: 0.25 um  
Mode: constant pressure  
Pressure: 9.17 psi  
Nominal initial flow: 0.7 mL/min  
Average velocity: 20 cm/sec  
Inlet: Front Inlet  
Outlet: Back Detector  
Outlet pressure: ambient

#### COLUMN 2

(not installed)

#### FRONT DETECTOR (FID)

Temperature: 250 'C (Off)  
Hydrogen flow: 40.0 mL/min (Off)  
Air flow: 450.0 mL/min (Off)  
Mode: Constant makeup flow  
Makeup flow: 45.0 mL/min (Off)  
Makeup Gas Type: Nitrogen  
Flame: Off  
Electrometer: Off  
Lit offset: 2.0

#### BACK DETECTOR (μECD)

Temperature: 250 'C (On)  
Mode: Constant column+makeup flow  
Combined flow: 20.0 mL/min  
Makeup flow: On  
Makeup Gas Type: Argon methane 5%  
Electrometer: On

#### SIGNAL 1

Data rate: 20 Hz

#### SIGNAL 2

Data rate: 20 Hz

Type: back detector  
Save Data: On  
Zero: 0.0 (Off)  
Range: 0  
Fast Peaks: Off  
Attenuation: 0

Type: front detector  
Save Data: Off  
Zero: 0.0 (Off)  
Range: 0  
Fast Peaks: Off  
Attenuation: 0

COLUMN COMP 1  
Derive from back detector

COLUMN COMP 2  
Derive from back detector

AUX PRESSURE 3  
Description:  
Gas Type: Helium  
Initial pressure: 0.00 psi (Off)

AUX PRESSURE 4  
Description:  
Gas Type: Helium  
Initial pressure: 0.00 psi (Off)

AUX PRESSURE 5  
Description:  
Gas Type: Helium  
Initial pressure: 0.00 psi (Off)

POST RUN  
Post Time: 0.00 min

#### TIME TABLE

| Time | Specifier | Parameter & Setpoint |
|------|-----------|----------------------|
|------|-----------|----------------------|

#### GC Injector

##### Front Injector:

|                          |                  |
|--------------------------|------------------|
| Sample Washes            | 2                |
| Sample Pumps             | 3                |
| Injection Volume         | 1.00 microliters |
| Syringe Size             | 5.0 microliters  |
| PreInj Solvent A Washes  | 2                |
| PreInj Solvent B Washes  | 2                |
| PostInj Solvent A Washes | 2                |
| PostInj Solvent B Washes | 2                |
| Viscosity Delay          | 0 seconds        |
| Plunger Speed            | Fast             |
| PreInjection Dwell       | 0.00 minutes     |
| PostInjection Dwell      | 0.00 minutes     |

##### Back Injector:

No parameters specified

## Section S2.5: Overview of GC-MS Methods

---

---

### 6890 GC METHOD

---

---

#### OVEN

Equilibration time: 0.50 min  
Maximum temp: 260 C  
Initial temp: 45 C (On)  
Initial time: 3.00 min  
Ramps:  
# Rate Final temp Final time  
1 10.00 250 5.00  
2 0 (Off)  
Post temp: 0 C  
Post time: 0.00 min  
Run time: 28.50 min

#### FRONT INLET (SPLIT/SPLITLESS)

Mode: Splitless  
Initial temp: 250 C (Off)  
Pressure: 7.3 psi (Off)  
Purge flow: 50.0 mL/min  
Purge time: 2.00 min  
Total flow: 53.7 mL/min  
Gas saver: On  
Saver flow: 20.0 mL/min  
Saver time: 2.00 min  
Gas type: Helium

#### BACK INLET (SPLIT/SPLITLESS)

Mode: Split  
Initial temp: 140 C (On)  
Pressure: 0.0 psi (Off)  
Total flow: 45.0 mL/min  
Gas saver: Off  
Gas type: Helium

#### COLUMN 1

Capillary Column  
Max temperature: 320 C  
Nominal length: 30.0 m  
Nominal diameter: 250.00 um  
Nominal film thickness: 0.25 um  
Mode: constant flow  
Initial flow: 1.0 mL/min  
Nominal init pressure: 7.3 psi  
Average velocity: 36 cm/sec  
Inlet: Front Inlet  
Outlet: MSD  
Outlet pressure: vacuum

COLUMN 2  
(not installed)

FRONT DETECTOR (NO DET)

BACK DETECTOR (NO DET)

SIGNAL 1  
Save Data: Off

SIGNAL 2  
Save Data: Off

THERMAL AUX 2  
Use: MSD Transfer Line Heater  
Initial temp: 280 C (On)

POST RUN  
Post Time: 0.00 min

INJECTOR 1  
Solvent Wash Mode: A, B  
Waste Bottle Use: A Only  
Sample Volume (uL): 2.000  
Syringe size (uL): 5.0  
Pre washes from bottle A: 2  
Pre washes from bottle B: 2  
Post washes from bottle A: 2  
Post washes from bottle B: 2  
Viscosity delay (seconds): 0  
Pre injection dwell (min): 0.00  
Post injection dwell (min): 0.00  
Sample skim depth (mm): 0.0 (Off)  
Plunger Speed: Fast  
Solvent saver: Off

ALS ERRORS:  
On missing vial: pause

TIME TABLE  
Time(min) Parameter & Setpoint

Column 1 Inventory Number :  
Column 2 Inventory Number :

#### MS ACQUISITION PARAMETERS

General Information

---

Tune File : atune.u  
Acquisition Mode : Scan

MS Information

---

Solvent Delay : 0.00 min

EMV Mode : Relative  
Relative Voltage : 0  
Resulting EM Voltage : 1812

[Scan Parameters]

Low Mass : 35.0  
High Mass : 300.0  
Threshold : 0  
Sample # : 2 A/D Samples 4  
Plot 2 low mass : 33.0  
Plot 2 high mass : 300.0

[MSZones]

MS Source : 230 C maximum 250 C  
MS Quad : 150 C maximum 200 C

END OF MS ACQUISITION PARAMETERS

TUNE PARAMETERS for SN: US02080150

---

Trace Ion Detection is OFF.

EMISSION : 34.610  
ENERGY : 69.922  
REPELLER : 29.955  
IONFOCUS : 90.157  
ENTRANCE\_LE : 0.000  
EMVOLTS : 1811.765  
Actual EMV : 1811.77  
GAIN FACTOR : 2.07  
AMUGAIN : 2275.000  
AMUOFFSET : 126.000  
FILAMENT : 1.000  
DCPOLARITY : 0.000  
ENTLENSOFFS : 25.098  
MASSGAIN : 251.000  
MASSOFFSET : -10.000

END OF TUNE PARAMETERS

---

END OF INSTRUMENT CONTROL PARAMETERS

---

**Section S2.6: Limits of Detection and Quality Controls**

The limits of detection (LOD) and limits of quantification (LOQ) for all compounds are summarized in Table S5. The LOQ for all compounds ranged from 0.01–1 µg/L however most were at 0.1 µg/L. Values between the LOD and LOQ were included in variability and toxicity analysis for compounds that had high detection frequencies (>60%) within a given distribution system. Although these values have a higher uncertainty, they were included because they provide the best available point estimate of potential exposure and toxicity. The relative standard deviation (RSD) between QC recoveries (GC–ECD) and QC peak response (GC–MS) are presented in Table S5. Accuracies for all points used in the calibration curve from the LOQ to the maximum calibration point are also reported in Table S5. Retention times for GC–ECD and GC–MS are presented in Tables S3 and S4, respectively.

**Table S3: GC–ECD Retention Times (RTs)**

| Class             | Compound                 | Abv.  | CAS no.    | RT – Winter (min) | RT – Summer (min) |
|-------------------|--------------------------|-------|------------|-------------------|-------------------|
| HAA <sub>5</sub>  | Chloroacetic Acid        | CAA   | 79–11–8    | 5.37              | 5.37              |
|                   | Dichloroacetic Acid      | DCAA  | 79–43–6    | 20.75             | 20.82             |
|                   | Trichloroacetic Acid     | TCAA  | 76–03–9    | 23.29             | 23.33             |
|                   | Bromoacetic Acid         | BAA   | 79–08–3    | 19.97             | 20.05             |
|                   | Dibromoacetic Acid       | DBAA  | 631–64–1   | 26.29             | 26.32             |
| HAA <sub>UR</sub> | Bromochloroacetic Acid   | BCAA  | 5589–96–8  | 24.36             | 24.40             |
|                   | Bromodichloroacetic Acid | BDCAA | 71133–14–7 | 25.95             | 25.99             |
|                   | Chlorodibromoacetic Acid | CDBAA | 5278–95–5  | 27.72             | 27.75             |
|                   | Tribromoacetic Acid      | TBAA  | 75–96–7    | 29.13             | 29.17             |
|                   | Iodoacetic Acid          | IAA   | 64–69–7    | 29.83             | 29.87             |
|                   | Chloriodoacetic Acid     | CIAA  | 53715–09–6 | 27.07             | 27.11             |

*Note: Reported average RTs had RSD ranging from 0.003% – 0.18% across both seasons*

**Table S4: GC–MS Retention Times (RTs), Quantifiers, and Qualifiers**

| Class             | Compound                | Abv. | CAS no.    | RT – Winter (min) | RT – Summer (min) | Quantifier (m/z) | Qualifiers (m/z) |
|-------------------|-------------------------|------|------------|-------------------|-------------------|------------------|------------------|
| THM <sub>4</sub>  | Trichloromethane        | TCM  | 67–66–3    | 8.15              | 8.15              | 83               | 85, 47, 87       |
|                   | Bromodichloromethane    | BDCM | 75–27–4    | 10.41             | 10.50             | 83               | 85, 129, 87      |
|                   | Dibromochloromethane    | DBCM | 124–48–1   | 12.79             | 12.85             | 129              | 127, 131, 48     |
|                   | Tribromomethane         | TBM  | 75–25–2    | 15.08             | 15.18             | 173              | 171, 175, 91     |
| THM <sub>UR</sub> | Bromochloriodomethane   | BCIM | 34970–00–8 | 15.78             | 15.84             | 127              | 129, 131, 175    |
|                   | Chlorodiiodomethane     | CDIM | 638–73–3   | 18.66             | 18.64             | 175              | 127, 177, 302    |
| HAN               | Bromoacetonitrile       | BAN  | 590–17–0   | 11.60             | 11.77             | 119              | 121, 40, 79      |
|                   | Bromochloroacetonitrile | BCAN | 83463–62–1 | 12.81             | 12.86             | 74               | 76, 155, 153     |
|                   | Dibromoacetonitrile     | DBAN | 3252–43–5  | 15.24             | 15.32             | 120              | 118, 199, 79     |
|                   | Iodoacetonitrile        | IAN  | 624–75–9   | 14.87             | 14.90             | 167              | 127              |



**Table S5:** LODs, LOQs, Cal Curve Accuracies, and Quality Control RSDs

| Class             | Compound                 | Abv.  | Winter    |           |                  |                  | Summer    |           |                  |            |
|-------------------|--------------------------|-------|-----------|-----------|------------------|------------------|-----------|-----------|------------------|------------|
|                   |                          |       | LOD (ppb) | LOQ (ppb) | Cal Accuracy (%) | QC RSD (%)       | LOD (ppb) | LOQ (ppb) | Cal Accuracy (%) | QC RSD (%) |
| THM <sub>4</sub>  | Trichloromethane         | TCM   | 0.025     | 0.25      | 109 ± 20         | N/A <sup>a</sup> | 0.1       | 0.25      | 101 ± 34         | 12.8       |
|                   | Bromodichloromethane     | BDCM  | 0.025     | 0.1       | 114 ± 28         | 18.7             | 0.05      | 0.1       | 110 ± 26         | 30.5       |
|                   | Dibromochloromethane     | DBCM  | 0.01      | 0.1       | 103 ± 13         | 17.2             | 0.05      | 0.1       | 103 ± 13         | 22.6       |
|                   | Tribromomethane          | TBM   | 0.01      | 0.5       | 111 ± 27         | 23.0             | 0.05      | 0.1       | 103 ± 31         | 6.1        |
| THM <sub>UR</sub> | Bromochloriodomethane    | BCIM  | 0.05      | 0.1       | 110 ± 33         | 17.2             | 0.01      | 0.025     | 99 ± 36          | 11.4       |
|                   | Chlorodiodomethane       | CDIM  | 0.1       | 0.25      | 93 ± 27          | 20.0             | 0.1       | 0.25      | 90 ± 16          | 18.5       |
| HAA <sub>5</sub>  | Chloroacetic Acid        | CAA   | 0.5       | 1         | 114 ± 17         | 62.1             | 0.5       | 1         | 117 ± 20         | 30.7       |
|                   | Dichloroacetic Acid      | DCAA  | 0.1       | 0.25      | 106 ± 11         | 21.8             | 0.1       | 1         | 111 ± 15         | 11.1       |
|                   | Trichloroacetic Acid     | TCAA  | 0.1       | 0.25      | 92 ± 13          | 15.5             | 0.05      | 0.1       | 100 ± 12         | 8.1        |
|                   | Bromoacetic Acid         | BAA   | 0.25      | 0.25      | 100 ± 8          | 16.6             | 0.1       | 0.25      | 111 ± 15         | 6.6        |
|                   | Dibromoacetic Acid       | DBAA  | 0.025     | 0.1       | 80 ± 19          | 19.5             | 0.01      | 0.1       | 99 ± 8           | 6.8        |
| HAA <sub>UR</sub> | Bromochloroacetic Acid   | BCAA  | 0.25      | 0.25      | 97 ± 14          | 20.9             | 0.25      | 0.5       | 114 ± 16         | 10.4       |
|                   | Bromodichloroacetic Acid | BDCAA | 0.25      | 1         | 89 ± 24          | 11.6             | 0.05      | 0.1       | 81 ± 19          | 3.9        |
|                   | Chlorodibromoacetic Acid | CDBAA | 0.1       | 0.25      | 86 ± 19          | 44.4             | 0.1       | 0.25      | 85 ± 18          | 8.9        |
|                   | Tribromoacetic Acid      | TBAA  | 0.5       | 1         | 92 ± 16          | 36.8             | 0.5       | 1         | 95 ± 16          | 13.2       |
|                   | Iodoacetic Acid          | IAA   | 0.5       | 1         | 101 ± 14         | 24.3             | 0.05      | 0.1       | 92 ± 13          | 6.4        |
|                   | Chloroiodoacetic Acid    | CIAA  | 0.05      | 0.1       | 98 ± 16          | 39.4             | 0.05      | 0.1       | 101 ± 14         | 6.1        |
| HAN               | Bromoacetonitrile        | BAN   | 0.5       | 1         | 110 ± 39         | 25.0             | 0.1       | 0.5       | 107 ± 28         | 14.5       |
|                   | Bromochloroacetonitrile  | BCAN  | 0.025     | 0.1       | 102 ± 20         | 24.4             | 0.025     | 0.1       | 101 ± 20         | 40.7       |
|                   | Dibromoacetonitrile      | DBAN  | 0.05      | 1         | 107 ± 26         | 20.0             | 0.025     | 0.1       | 98 ± 39          | 42.5       |
|                   | Iodoacetonitrile         | IAN   | 0.5       | 1         | 105 ± 24         | 20.4             | 0.5       | 1         | 95 ± 33          | 19.8       |

<sup>a</sup> Compounds were under solvent peak for winter sampling but later verified during summer sampling

**Section S2.7: Compound Toxicity Potencies**

**Table S6:** Compound Toxicity Potencies and Molecular Weights (MW). *The colors signify effect concentrations from least potent (yellow) to most potent (red orange)*

| Class             | Compound                 | Abv.  | MW (g/mol) | ARE-bla<br>EC <sub>IR1.5</sub><br>(mol/L) | AREc32<br>EC <sub>IR1.5</sub><br>(mol/L) | P53-bla<br>EC <sub>IR1.5</sub><br>(mol/L) | Microtox<br>EC <sub>50</sub><br>(mol/L) | CHO<br>LC <sub>50</sub><br>(mol/L) |
|-------------------|--------------------------|-------|------------|-------------------------------------------|------------------------------------------|-------------------------------------------|-----------------------------------------|------------------------------------|
| THM <sub>4</sub>  | Trichloromethane         | TCM   | 119.37     | 4.00E-02 <sup>a</sup>                     | 1.40E-02                                 | 3.00E-02 <sup>a</sup>                     | 6.80E-03                                | 9.62E-03                           |
|                   | Bromodichloromethane     | BDCM  | 163.83     | 4.00E-02 <sup>a</sup>                     | 6.10E-03                                 | 1.00E-02 <sup>a</sup>                     | 1.80E-03                                | 1.15E-02                           |
|                   | Dibromochloromethane     | DBCM  | 208.28     | 1.60E-02                                  | 1.90E-03                                 | 1.00E-02 <sup>a</sup>                     | 1.00E-03                                | 5.36E-03                           |
|                   | Tribromomethane          | TBM   | 252.73     | 4.00E-02 <sup>a</sup>                     | 1.40E-03                                 | 6.00E-03 <sup>a</sup>                     | 2.30E-04                                | 3.96E-03                           |
| THM <sub>UR</sub> | Bromochloriodomethane    | BCIM  | 255.28     | 2.80E-03                                  | 1.20E-04                                 | 2.90E-03                                  | 9.70E-05                                | 2.42E-03                           |
|                   | Chlorodiiodomethane      | CDIM  | 302.28     | 2.80E-04                                  | 2.70E-05                                 | 2.60E-04                                  | 7.10E-05                                | 2.41E-03                           |
| HAA <sub>5</sub>  | Chloroacetic Acid        | CAA   | 94.50      | 2.50E-04                                  | 2.70E-04                                 | 1.70E-04                                  | 3.80E-03                                | 8.10E-04                           |
|                   | Dichloroacetic Acid      | DCAA  | 128.94     | 1.60E-02                                  | 6.00E-03                                 | 3.00E-02 <sup>a</sup>                     | 3.70E-03                                | 7.30E-03                           |
|                   | Trichloroacetic Acid     | TCAA  | 163.38     | 2.00E-02 <sup>a</sup>                     | 2.00E-02 <sup>a</sup>                    | 2.00E-02 <sup>a</sup>                     | 1.30E-02                                | 2.40E-03                           |
|                   | Bromoacetic Acid         | BAA   | 138.95     | 1.10E-05                                  | 5.20E-06                                 | 9.50E-06                                  | 3.80E-05                                | 9.60E-06                           |
|                   | Dibromoacetic Acid       | DBAA  | 217.84     | 2.50E-04                                  | 1.20E-04                                 | 2.60E-04                                  | 8.50E-04                                | 5.90E-04                           |
| HAA <sub>UR</sub> | Bromochloroacetic Acid   | BCAA  | 173.39     | 4.60E-04                                  | 1.40E-04                                 | 2.30E-04                                  | 1.20E-03                                | 7.78E-04                           |
|                   | Bromodichloroacetic Acid | BDCAA | 207.83     | 4.00E-03                                  | 2.00E-03                                 | 3.00E-03 <sup>a</sup>                     | 6.10E-04                                | 6.85E-04                           |
|                   | Chlorodibromoacetic Acid | CDBAA | 252.29     | 2.20E-03                                  | 4.90E-03                                 | 2.00E-03 <sup>a</sup>                     | 4.20E-04                                | 2.02E-04                           |
|                   | Tribromoacetic Acid      | TBAA  | 296.74     | 6.70E-04                                  | 4.40E-04                                 | 5.00E-04 <sup>a</sup>                     | 1.30E-04                                | 8.50E-05                           |
|                   | Iodoacetic Acid          | IAA   | 185.95     | 5.10E-06                                  | 3.60E-06                                 | 4.70E-06                                  | 1.70E-05                                | 2.95E-06                           |
|                   | Chloroiodoacetic Acid    | CIAA  | 220.39     | 1.00E-04                                  | 2.20E-05                                 | 1.10E-04                                  | 3.10E-05                                | 3.04E-04                           |
| HAN               | Bromoacetonitrile        | BAN   | 119.95     | n.t. <sup>b</sup>                         | n.t. <sup>b</sup>                        | n.t. <sup>b</sup>                         | n.t. <sup>b</sup>                       | 3.21E-06                           |
|                   | Bromochloroacetonitrile  | BCAN  | 154.39     | 1.10E-05                                  | 2.20E-06                                 | 1.30E-05                                  | 1.30E-05                                | 8.46E-06                           |
|                   | Dibromoacetonitrile      | DBAN  | 198.84     | 7.00E-06                                  | 1.50E-07                                 | 1.30E-05                                  | 8.50E-06                                | 2.85E-06                           |
|                   | Iodoacetonitrile         | IAN   | 166.95     | n.t. <sup>b</sup>                         | n.t. <sup>b</sup>                        | n.t. <sup>b</sup>                         | n.t. <sup>b</sup>                       | 3.30E-06                           |

<sup>a</sup> no effect observed at highest concentration tested

<sup>b</sup> compound not tested or included in Stalter et al.<sup>4</sup> study

**Section S3:** Additional Information for Results

**Table S7:** Overview of Detection Frequencies. *The colors signify low detection frequency (yellow) to high detection frequency (red orange)*

|                   |       | Winter Detection Frequency (%) |     |     |     |     |     |     |    | Summer Detection Frequency (%) |     |     |     |     |     |     |    |
|-------------------|-------|--------------------------------|-----|-----|-----|-----|-----|-----|----|--------------------------------|-----|-----|-----|-----|-----|-----|----|
| Class             | Abv.  | EB                             | SM  | WV  | YT  | IR  | LA  | MC  | MD | EB                             | SM  | WV  | YT  | IR  | LA  | MC  | MD |
| THM <sub>4</sub>  | TCM   | 100                            | 100 | 100 | 100 | 100 | 100 | 100 | 13 | 100                            | 100 | 100 | 100 | 100 | 100 | 93  | 13 |
|                   | BDCM  | 100                            | 100 | 100 | 100 | 100 | 100 | 100 | 13 | 100                            | 100 | 100 | 100 | 100 | 100 | 100 | 13 |
|                   | DBCMM | 0                              | 100 | 0   | 100 | 93  | 100 | 100 | 81 | 93                             | 0   | 40  | 100 | 100 | 100 | 100 | 80 |
|                   | TBM   | 0                              | 100 | 0   | 0   | 93  | 100 | 100 | 94 | 13                             | 0   | 0   | 0   | 93  | 100 | 100 | 80 |
| THM <sub>UR</sub> | BCIM  | 0                              | 100 | 0   | 0   | 87  | 100 | 0   | 0  | 0                              | 0   | 0   | 0   | 93  | 100 | 0   | 0  |
|                   | CDIM  | 0                              | 0   | 0   | 0   | 0   | 0   | 0   | 0  | 0                              | 0   | 0   | 0   | 0   | 0   | 0   | 0  |
| HAA <sub>5</sub>  | CAA   | 100                            | 100 | 100 | 100 | 60  | 100 | 0   | 0  | 20                             | 0   | 0   | 0   | 73  | 100 | 0   | 0  |
|                   | DCAA  | 100                            | 100 | 100 | 100 | 87  | 100 | 87  | 0  | 100                            | 100 | 100 | 100 | 100 | 100 | 73  | 0  |
|                   | TCAA  | 100                            | 100 | 100 | 100 | 87  | 100 | 0   | 0  | 100                            | 100 | 100 | 100 | 100 | 100 | 13  | 0  |
|                   | BAA   | 0                              | 0   | 0   | 0   | 53  | 100 | 0   | 0  | 13                             | 0   | 7   | 0   | 13  | 100 | 0   | 0  |
|                   | DBAA  | 47                             | 100 | 29  | 100 | 87  | 100 | 100 | 81 | 100                            | 100 | 100 | 100 | 100 | 100 | 100 | 80 |
| HAA <sub>UR</sub> | BCAA  | 100                            | 100 | 57  | 100 | 87  | 100 | 7   | 0  | 100                            | 100 | 53  | 100 | 93  | 100 | 33  | 0  |
|                   | BDCAA | 100                            | 93  | 100 | 100 | 87  | 100 | 53  | 0  | 100                            | 100 | 100 | 100 | 93  | 100 | 0   | 0  |
|                   | CDBAA | 0                              | 53  | 0   | 29  | 87  | 93  | 0   | 13 | 20                             | 0   | 20  | 0   | 93  | 100 | 13  | 20 |
|                   | TBAA  | 0                              | 0   | 0   | 0   | 33  | 0   | 0   | 0  | 0                              | 0   | 27  | 0   | 0   | 21  | 0   | 7  |
|                   | IAA   | 0                              | 7   | 0   | 0   | 0   | 0   | 0   | 13 | 100                            | 100 | 93  | 87  | 93  | 7   | 87  | 0  |
|                   | CIAA  | 0                              | 100 | 0   | 0   | 20  | 0   | 0   | 0  | 0                              | 0   | 0   | 0   | 0   | 0   | 0   | 0  |
| HAN               | BAN   | 0                              | 0   | 0   | 0   | 0   | 0   | 0   | 0  | 0                              | 40  | 0   | 0   | 60  | 100 | 7   | 0  |
|                   | BCAN  | 0                              | 100 | 0   | 100 | 87  | 100 | 80  | 19 | 20                             | 0   | 100 | 100 | 93  | 100 | 100 | 40 |
|                   | DBAN  | 0                              | 0   | 0   | 0   | 87  | 100 | 7   | 69 | 20                             | 7   | 27  | 0   | 93  | 100 | 100 | 73 |
|                   | IAN   | 0                              | 0   | 0   | 0   | 0   | 0   | 0   | 0  | 0                              | 0   | 0   | 0   | 0   | 0   | 0   | 0  |

**Section S3.1:** Water Utility Reported vs. Measured Regulated THM<sub>4</sub> and HAA<sub>5</sub>

The water utility reported and measured regional averages for THM<sub>4</sub> and HAA<sub>5</sub> are presented in Table S8. Measured THM<sub>4</sub> concentrations averaged +9.6 µg/L more than reported values which may be due to lack of use of a dechlorinating agent and extended reaction times. THM concentrations have been found to increase with residence time, forming as end products while other DBPs are intermediates.<sup>2</sup> Measured HAA<sub>5</sub> concentrations averaged -4.4 µg/L less than reported values. Overall, measured regulated concentrations were comparable to values reported in water utility consumer confidence reports (CCR) with no statistical difference for both THM<sub>4</sub> ( $P = 0.10$ ,  $df = 7$ ) and HAA<sub>5</sub> ( $P = 0.19$ ,  $df = 6$ ).

**Table S8:** Water Utility Reported vs. Measured Regulated THM<sub>4</sub> and HAA<sub>5</sub>. *The bolded value represents the reported or measured locational running annual average (LRAA) or running annual average (RAA) followed by the range throughout the distribution system in parentheses. ND indicates concentrations not detected and NR indicates concentrations not reported.*

| Region | Water Utility Reported (µg/L)<br>Average (Range) |                     |                    | Measured (µg/L)<br>Average (Range) |                       |                       |
|--------|--------------------------------------------------|---------------------|--------------------|------------------------------------|-----------------------|-----------------------|
|        | Year Reported                                    | THM <sub>4</sub>    | HAA <sub>5</sub>   | Year Sampled                       | THM <sub>4</sub>      | HAA <sub>5</sub>      |
| EB     | 2020                                             | <b>49</b> (24-57)   | <b>43</b> (15-51)  | 2020                               | <b>87</b> (24-150)    | <b>42</b> (20-56)     |
| SM     | 2020                                             | <b>30</b> (14-41)   | <b>26</b> (9.0-35) | 2020                               | <b>39</b> (3-62)      | <b>21</b> (13-28)     |
| WV     | 2020                                             | <b>15</b> (NR)      | <b>14</b> (NR)     | 2020                               | <b>30</b> (15-62)     | <b>19</b> (8-34)      |
| YT     | 2020                                             | <b>44</b> (NR)      | <b>38</b> (NR)     | 2020                               | <b>62</b> (42-93)     | <b>20</b> (12-41)     |
| IR     | 2021                                             | <b>45</b> (6.7-56)  | <b>22</b> (1.9-22) | 2020                               | <b>36</b> (3-63)      | <b>8.5</b> (ND-9.5)   |
| LA     | 2020                                             | <b>27</b> (7-29)    | <b>11</b> (3-12)   | 2020                               | <b>30</b> (7-49)      | <b>11</b> (5-13)      |
| MC     | 2021                                             | <b>0.6</b> (ND-2.4) | NR                 | 2020                               | <b>2.2</b> (0.6-10.7) | <b>0.2</b> (0.01-0.5) |
| MD     | 2021                                             | <b>0.3</b> (ND-0.6) | <b>0</b> (ND-0)    | 2020                               | <b>1.7</b> (ND-5.3)   | <b>0.1</b> (ND-0.5)   |

### **Section S3.2:** Trends in DBP Concentrations by Source Water Type

#### *East Bay, San Mateo, Weaverville, and Yurok – Surface Water Source*

East Bay (EB) and San Mateo (SM) rely on large surface water systems including the Hetch Hetchy Regional Water System and Mokelumne River Watershed, respectively. Weaverville (WV) and Yurok Tribal Land (YT) also rely on surface water sources, but these are primarily local rivers or creeks. Regulated DBP concentrations were highest in these regions. Unregulated DBPs only accounted for ~3% of total measured concentrations and consisted primarily of BCAA, BDCAA, BCAN, and IAA.

#### *Irvine and Los Angeles – Mixed Water Source*

Irvine (IR) and Los Angeles (LA) had relatively low regulated compound concentrations but had the highest unregulated compound concentrations and the most diverse speciation with a total of 19 DBPs detected. Household level unregulated compound concentrations accounted for ~16% of total measured DBP concentrations and comprised primarily bromo-HAAs, HANs, and BCIM. The diversity of DBPs detected in these samples may be attributed to the complex nature of Irvine and Los Angeles' water supplies including surface water with historically elevated salinity levels, brackish groundwater, and indirect potable reuse of recycled water.

Both Los Angeles and Irvine rely on water imported by the Metropolitan Water District of Southern California (MWD) which consists of surface water from Northern California via the State Water Project and the Colorado River via the Colorado River Aqueduct. The Colorado River is known to have historical elevated salinity levels.<sup>6</sup> Both regions also use groundwater that is impacted by seawater intrusion. Higher bromide and iodide levels in high salinity source waters and brackish groundwater may result in the increased formation of bromo- and iodo-DBPs.<sup>7</sup> Irvine and Los Angeles had the highest reported bromide levels in their 2020 consumer confidence reports which ranged from 30–200 µg/L and ND–190 µg/L, respectively. To combat seawater intrusion and recharge aquifers both regions also inject highly treated wastewater or recycled water into their groundwater supplies, a process referred to as indirect potable reuse. However, DBPs are emerging as a concern for both direct and indirect potable reuse applications due to the increased amount of organic material, dissolved organic nitrogen, ammonia, bromide, and iodide present in recycled waters.<sup>8,9</sup> Elevated unregulated DBPs, particularly N-DBPs, have also been observed in treated drinking water from wastewater-influenced sources.<sup>10</sup>

Both Irvine and Los Angeles also use ammonia to form chloramines as a secondary disinfectant. While chloramination typically results in reduced overall DBP formation,<sup>11</sup> increases in HANs and iodo-THMs have been observed.<sup>12,13</sup> BCIM was consistently present in both regions and seasons at concentrations ranging from 0.02–1.4 µg/L with a few non-detects. HAN concentrations were highest in Irvine and Los Angeles at concentrations ranging from 0.6–7.4 µg/L with a few non-detects.

Although we cannot identify which water source(s) or disinfection processes are contributing specifically to observed DBP speciation in Irvine and Los Angeles household samples, the elevated unregulated concentrations and diverse speciation is noteworthy. Disinfection by-product formation potential experiments on each individual water source or water quality measurements (i.e. bromide, iodide, nitrogen, organic carbon) may help identify which sources are contributing DBP precursors of concern.

*Merced and Madera – Groundwater Source*

Merced (MC) and Madera (MD) both rely on groundwater from the San Joaquin Basin and use chlorination disinfection processes. Merced and Madera overall had the lowest total DBP concentrations ranging from ND–11.3 µg/L. THM<sub>4</sub>, DBAA, BCAN, and DBAN were the primary DBPs detected in both regions with more brominated compounds formed compared with their chlorinated analogs. This shift in speciation could be due to high bromide levels (>50 µg/L) in the source water.<sup>14</sup> While bromide levels in Madera are not reported, Merced reported bromide levels ranging from 24–170 µg/L in their 2020 consumer confidence report.

**Section S3.3:** Comparisons of CAT across Endpoints and System Variables (Figures S3-S8)  
 Figure S3 shows the compact letter displays (*clcd*) of the Tukey HSD comparisons of calculated additive toxicity (CAT) across the five biological endpoints (ARE-bla, AREc32, CHO, Microtox, p53-bla) and system variables (season, region, disinfection type, source water type).  
 Figures S3-S8 show the boxplots of CAT for each biological endpoint and system variable.

**Figure S3:** Tukey HSD Test Comparisons of CAT across Biological Endpoints

|                  |                   | Biological Endpoints |        |         |          |     | df  |      |
|------------------|-------------------|----------------------|--------|---------|----------|-----|-----|------|
|                  |                   | ARE-bla              | AREc32 | P53-bla | Microtox | CHO |     |      |
| System Variables | All Samples       |                      | a      | b       | a        | a   | a   | 1185 |
|                  | Season            | Winter               | a      | b       | a        | a   | a   | 590  |
|                  |                   | Summer               | a      | b       | a        | a   | a   | 590  |
|                  | Disinfection Type | Chlorination         | a      | b       | a        | a   | a   | 590  |
|                  |                   | Chloramination       | a      | b       | a        | a   | a   | 590  |
|                  | Source Type       | Large Surface Water  | a      | a       | a        | a   | a   | 295  |
|                  |                   | Small Surface Water  | a      | c       | ab       | a   | b   | 285  |
|                  |                   | Mixed Water          | a      | b       | a        | a   | a   | 290  |
|                  |                   | Groundwater          | a      | b       | a        | a   | a   | 300  |
|                  | Region            | EB                   | ab     | b       | ab       | a   | b   | 145  |
|                  |                   | SM                   | a      | a       | a        | a   | a   | 145  |
|                  |                   | WV                   | a      | b       | a        | a   | ab  | 140  |
|                  |                   | YT                   | a      | c       | ab       | a   | b   | 140  |
|                  |                   | IR                   | a      | b       | a        | a   | a   | 145  |
|                  |                   | LA                   | a      | b       | a        | a   | a   | 140  |
|                  |                   | MC                   | a      | b       | a        | a   | a   | 145  |
| MD               |                   | a                    | b      | a       | a        | a   | 150 |      |

**Figure S4:** CAT Across All Endpoints and Samples

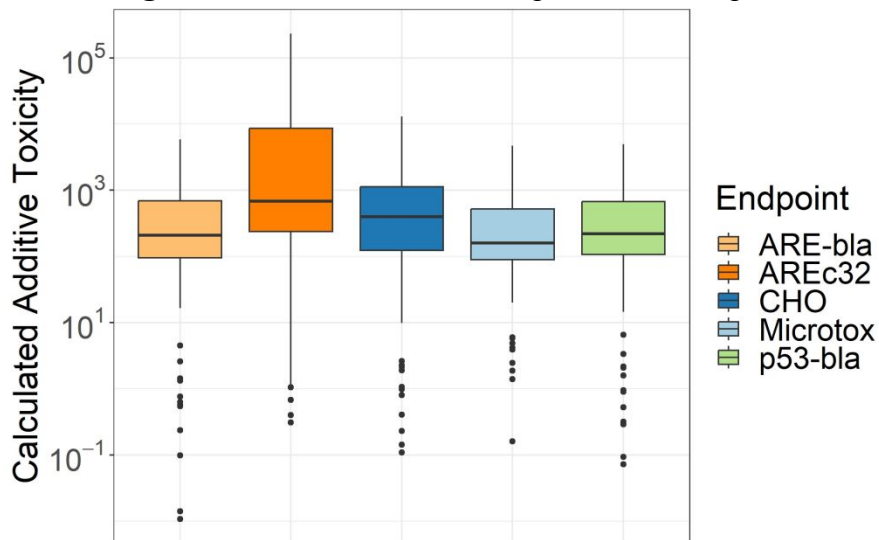

**Figure S5: CAT Across All Endpoints and Seasons**

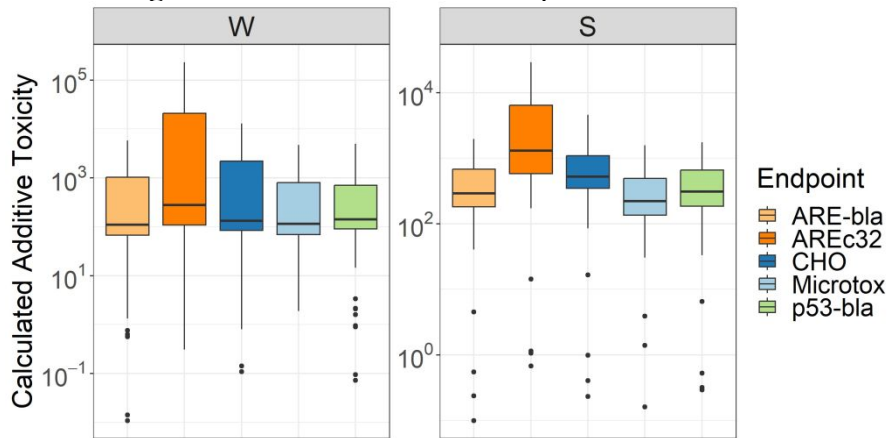

**Figure S6: CAT Across All Endpoints and Disinfection Types**

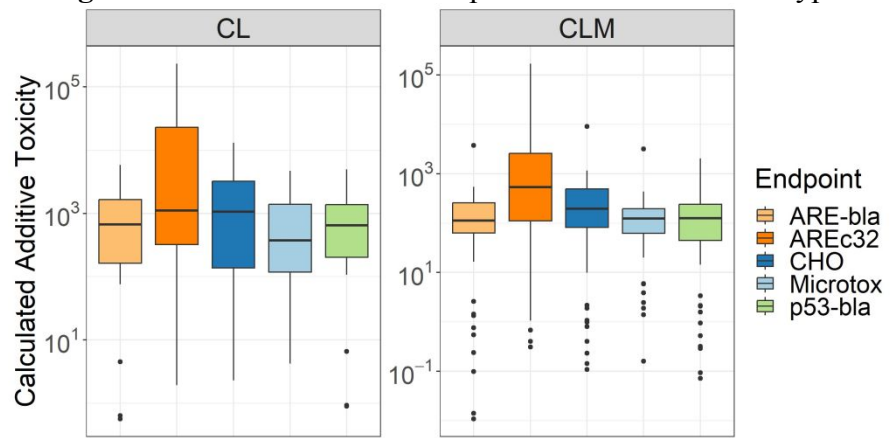

**Figure S7: CAT Across All Endpoints and Source Water Types**

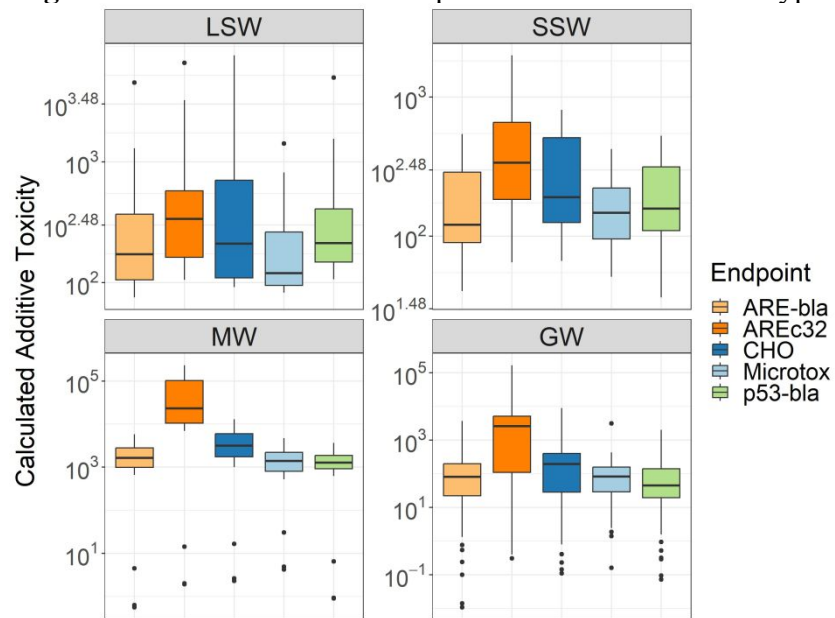



**Figure S8: CAT Across All Endpoints and Regions**

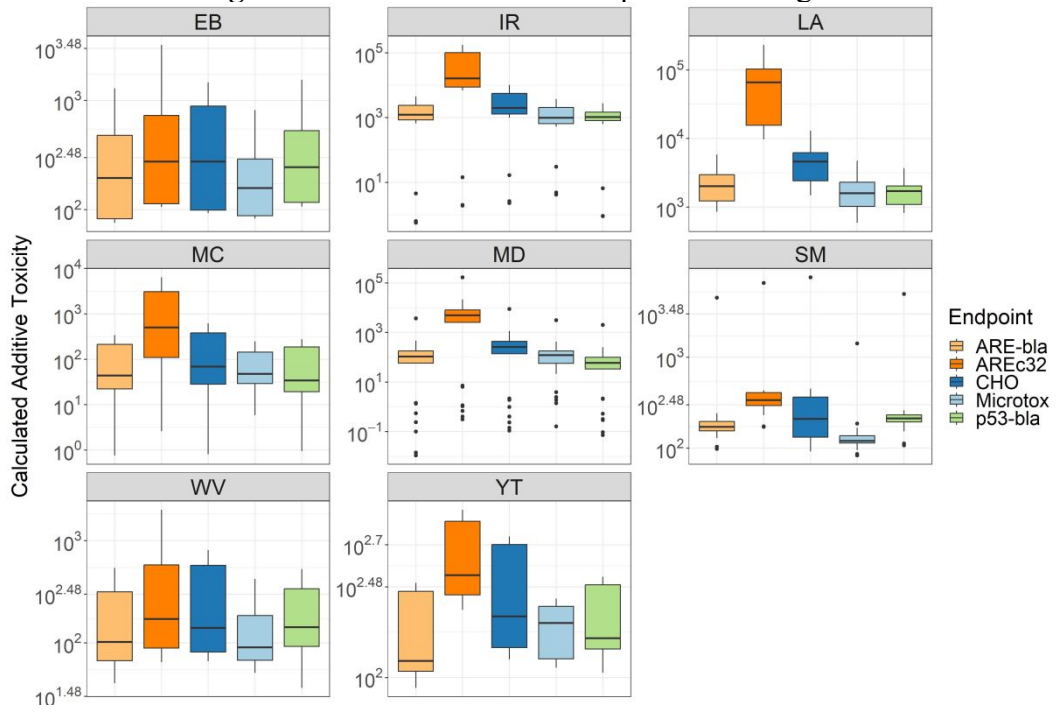

**Section S3.4: Regulated vs. Unregulated Concentrations Predictive Models**

This section provides predictive models for regulated vs. unregulated concentrations grouped by season, region, disinfection type, and source water type variables. The model strength coefficients of determinations ( $r^2$ ) are summarized in Table S9. Coefficients of determination values of  $r^2 > 0.7$  indicates a strong model (green),  $0.3 < r^2 < 0.7$  indicates a fair model (yellow), and  $r^2 < 0.3$  indicates a poor model (orange). Plots of each model are shown in Section S3.5.

**Table S9: Regulated vs. Unregulated Concentrations Model Strengths**

| Group         | Variable             | R <sup>2</sup> | P       | df      | Group          | Variable       | R <sup>2</sup> | P       | df    |    |
|---------------|----------------------|----------------|---------|---------|----------------|----------------|----------------|---------|-------|----|
| All           | ~                    | < 0.01         | 0.146   | 236     | ~Source-Season | LSW-W          | 0.66           | < 0.001 | 26    |    |
| ~Season       | W                    | 0.01           | 0.278   | 236     |                | LSW-S          | 0.64           | < 0.001 | 26    |    |
|               | S                    | 0.13           | < 0.001 | 236     |                | SSW-W          | 0.66           | < 0.001 | 26    |    |
| ~Disinfection | CL                   | 0.42           | < 0.001 | 117     |                | SSW-S          | 0.02           | 0.436   | 28    |    |
|               | CLM                  | 0.09           | < 0.001 | 117     |                | MW-W           | 0.51           | < 0.001 | 26    |    |
| ~Source       | LSW                  | 0.10           | 0.015   | 54      |                | MW-S           | 0.07           | 0.188   | 26    |    |
|               | SSW                  | 0.12           | 0.007   | 56      |                | GW-W           | < 0.01         | 0.742   | 21    |    |
|               | MW                   | 0.23           | < 0.001 | 54      |                | GW-S           | 0.09           | 0.126   | 24    |    |
|               | GW                   | 0.02           | 0.305   | 47      |                | ~Region-Season | EB-W           | 0.01    | 0.673 | 13 |
| ~Region       | EB                   | 0.36           | < 0.001 | 25      |                |                | EB-S           | 0.24    | 0.104 | 10 |
|               | SM                   | 0.59           | < 0.001 | 27      |                |                | SM-W           | 0.31    | 0.038 | 12 |
|               | WV                   | 0.04           | 0.305   | 27      |                |                | SM-S           | < 0.01  | 0.975 | 13 |
|               | YT                   | 0.39           | < 0.001 | 27      | WV-W           |                | 0.07           | 0.366   | 12    |    |
|               | IR                   | 0.47           | < 0.001 | 25      | WV-S           |                | 0.07           | 0.332   | 13    |    |
|               | LA                   | 0.03           | 0.401   | 27      | YT-W           |                | 0.57           | 0.002   | 12    |    |
|               | MC                   | 0.01           | 0.603   | 26      | YT-S           |                | < 0.01         | ~1.00   | 13    |    |
|               | MD                   | 0.13           | 0.115   | 19      | IR-W           |                | 0.31           | 0.046   | 11    |    |
|               | ~Disinfection-Season | CL-W           | 0.34    | < 0.001 | 49             |                | IR-S           | 0.31    | 0.040 | 12 |
| CL-S          |                      | 0.48           | < 0.001 | 54      | LA-W           |                | 0.71           | < 0.001 | 13    |    |
| CLM-W         |                      | 0.33           | < 0.001 | 55      | LA-S           |                | 0.52           | 0.003   | 12    |    |
| CLM-S         |                      | < 0.01         | 0.897   | 53      | MC-W           |                | 0.10           | 0.283   | 11    |    |
|               |                      |                |         |         | MC-S           |                | 0.02           | 0.603   | 13    |    |
|               |                      |                |         |         | MD-W           |                | < 0.01         | 0.928   | 8     |    |
|               |                      |                |         |         | MD-S           |                | 0.02           | 0.671   | 9     |    |

**Figure S9:** Regulated vs. Unregulated Concentrations by Source and Season

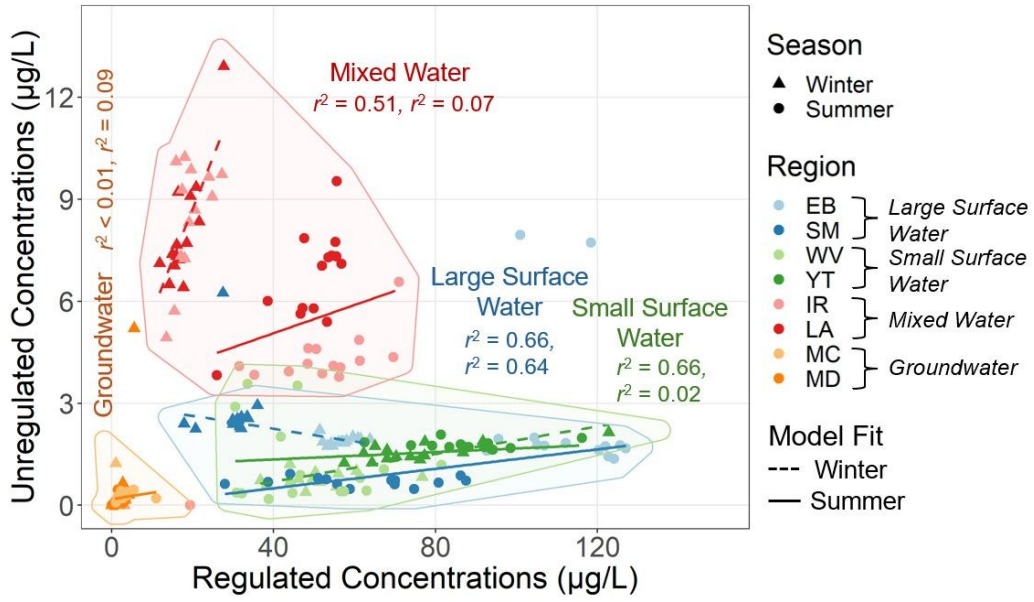

**Section S3.5: Regulated vs. Unregulated Concentrations Figures (S10-S17)**

**Figure S10: Regulated vs. Unregulated Concentrations**

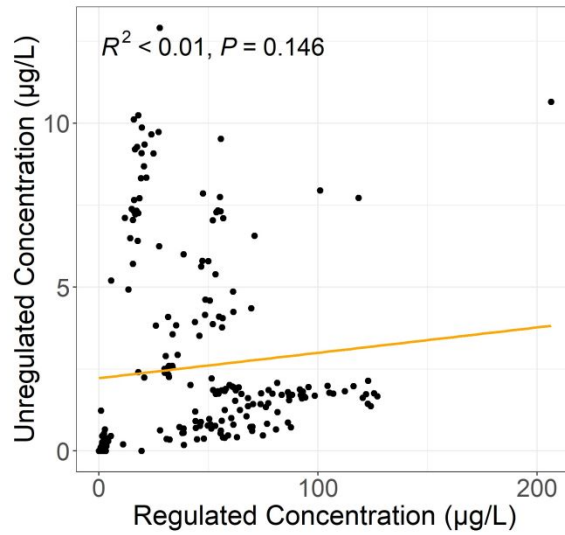

**Figure S11: Regulated vs. Unregulated Concentrations by Season**

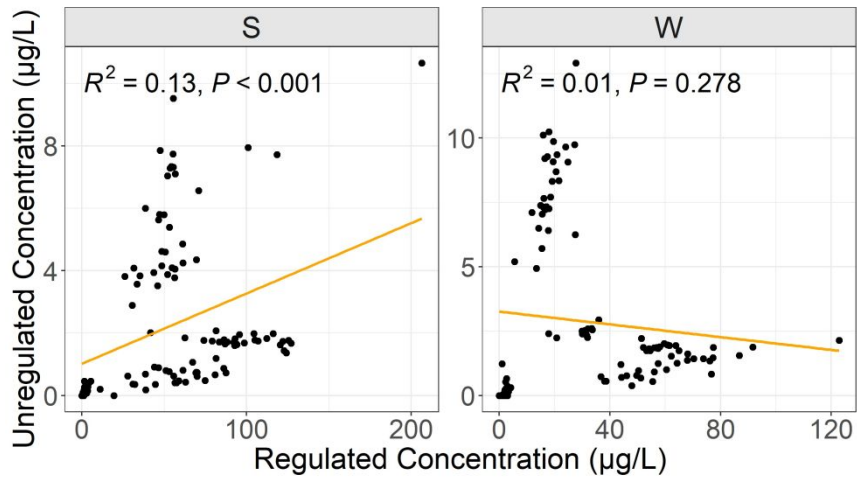

**Figure S12: Regulated vs. Unregulated Concentrations by Disinfection Type**

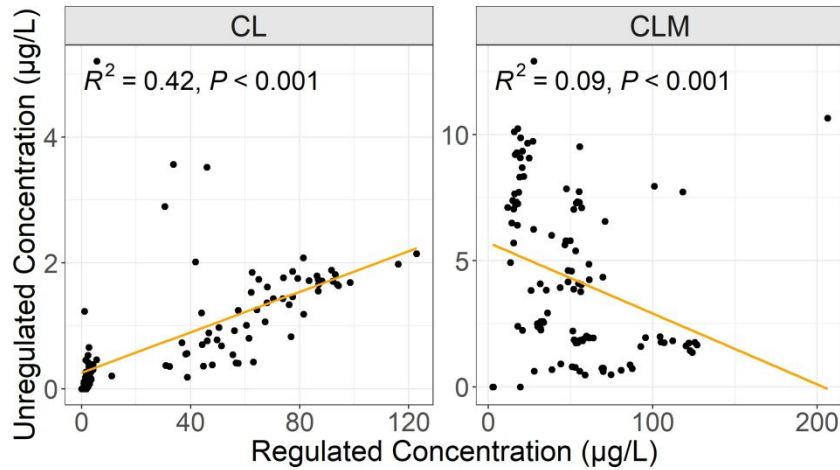

**Figure S13: Regulated vs. Unregulated Concentrations by Source Type**

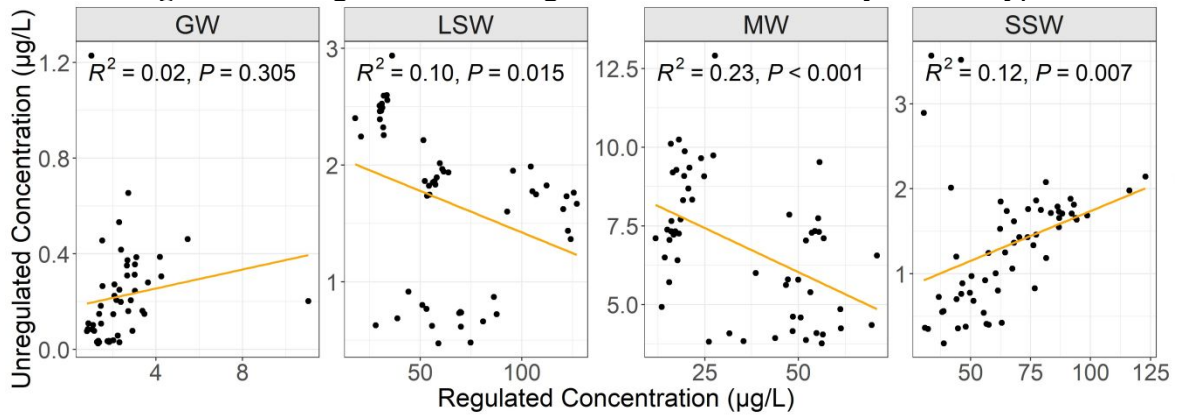

**Figure S14: Regulated vs. Unregulated Concentrations by Region**

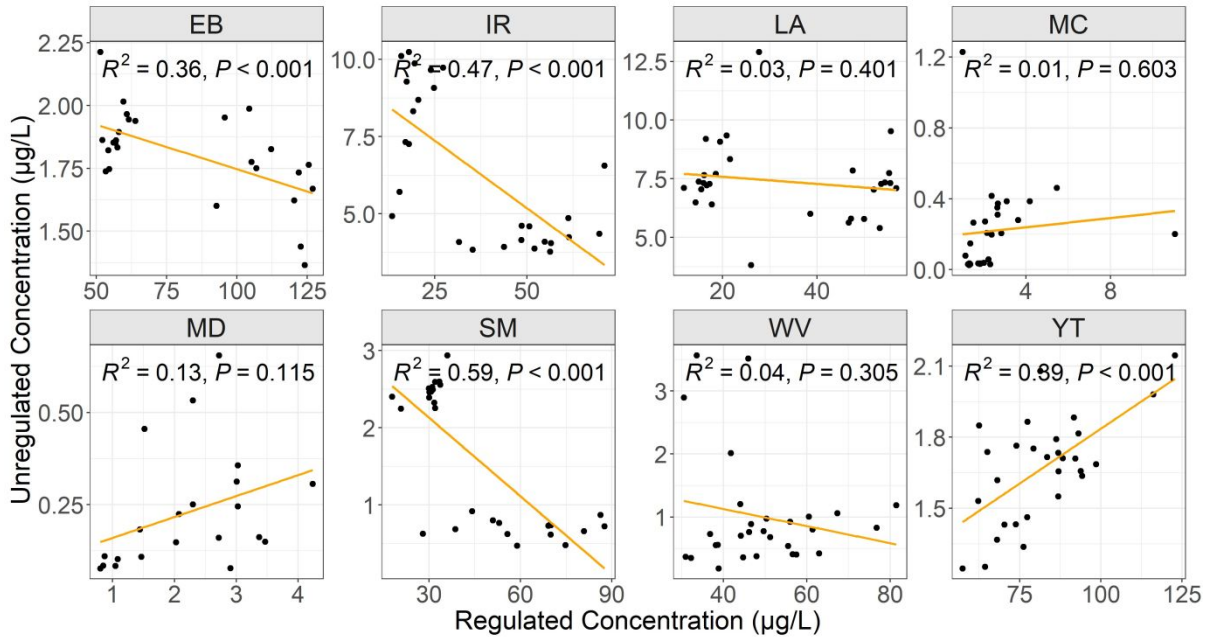

**Figure S15: Regulated vs. Unregulated Concentrations by Disinfection and Season**

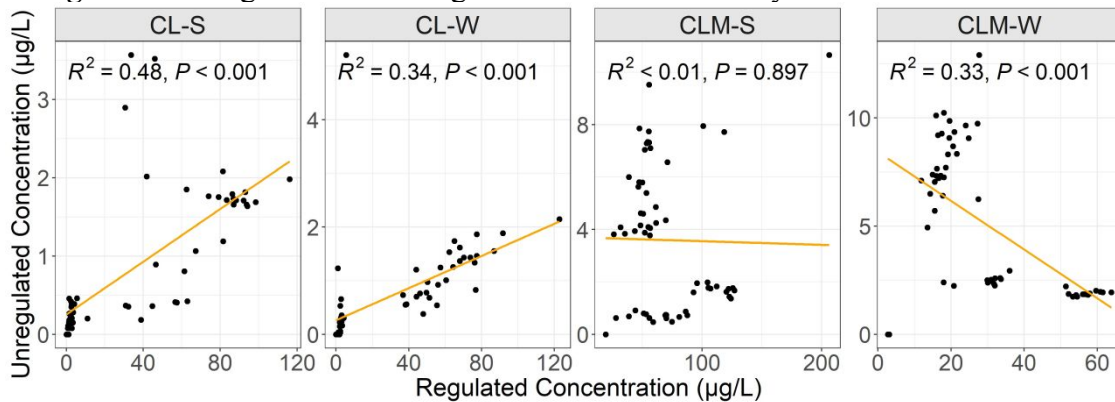

**Figure S16: Regulated vs. Unregulated Concentrations by Source and Season**

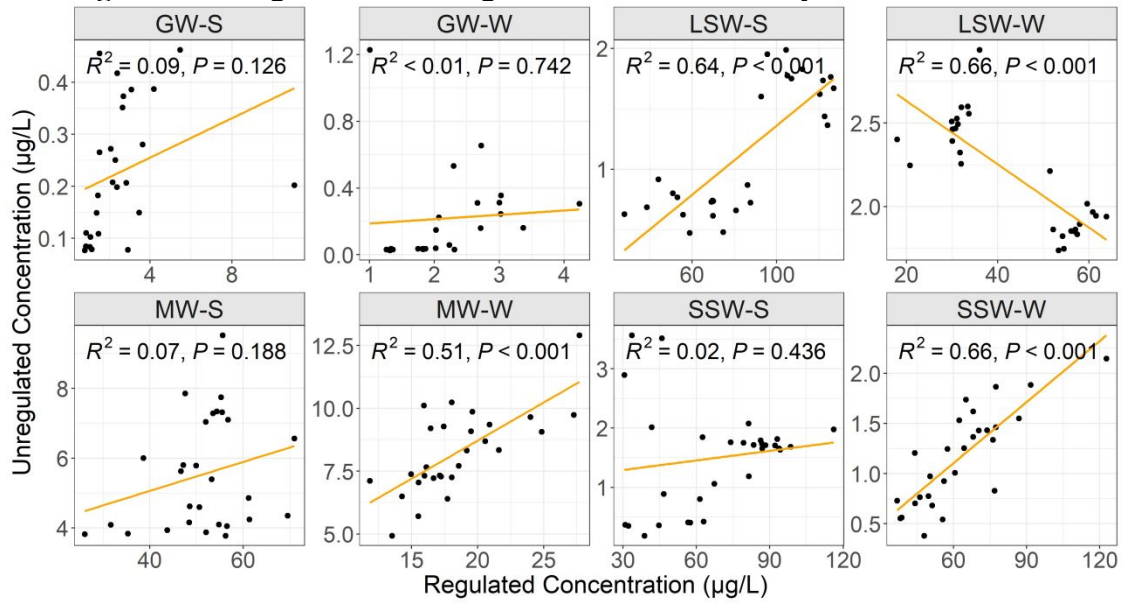

**Figure S17: Regulated vs. Unregulated Concentrations by Region and Season**

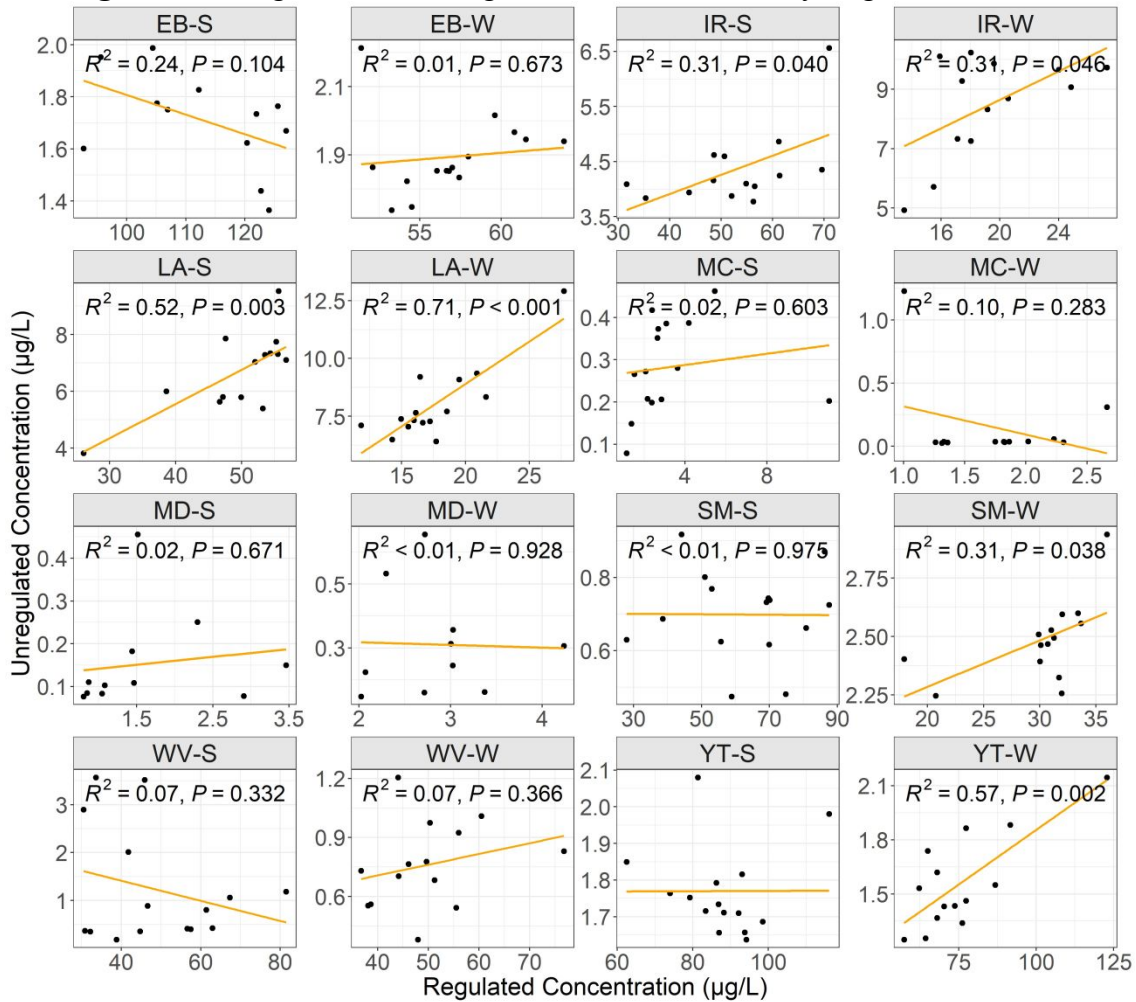

### Section S3.6: Regulated vs. Unregulated CAT Predictive Models

This section provides predictive models for regulated vs. unregulated AREc32 oxidative stress and CHO cytotoxicity grouped by season, region, disinfection type, and source water type variables. Model strength coefficients of determinations ( $r^2$ ) for AREc32 oxidative stress are summarized in Table S10. Model strength coefficients of determinations ( $r^2$ ) for CHO cytotoxicity are summarized in Table S11. Coefficients of determination values of  $r^2 > 0.7$  indicates a strong model (green),  $0.3 < r^2 < 0.7$  indicates a fair model (yellow), and  $r^2 < 0.3$  indicates a poor model (orange). There was no statistically significant difference ( $P = 0.12$ ,  $df = 43$ ) in AREc32 and CHO coefficients of determinations as summarized in Figure S18. Linear models for the AREc32 endpoint by system variable are shown in Section S3.7. Linear models for the CHO endpoint by system variable are shown in Section S3.8.

#### Removed Outliers

The following households were removed from the linear models due to zero CAT values for either regulated or unregulated DBPs: IR11-W, IR14-W, MC4-W, MC10-W, MD2-W, MD3-W, MD8-W, MD12-W, MD14-W, IR11-S, MD2-S, MD10-S, MD13-S, and MD16-S. Other households were removed due to spikes in potent unregulated DBPs including MD11-W and SM15-W. This was driven by a high detect of DBAN and IAA, respectively. While it's important to highlight that slight changes in potent concentrations can have a drastic impact on CAT, these households were removed from the linear models due to their major influence. EB5-S, EB8-S, and EB13-S were also removed due to high regulated CAT which was driven by elevated BAA concentrations. These three households were also in the upper part of the distribution system, separated from the other households.

**Figure S18:** Regulated vs. Unregulated CAT Models for AREc32 and CHO Endpoints

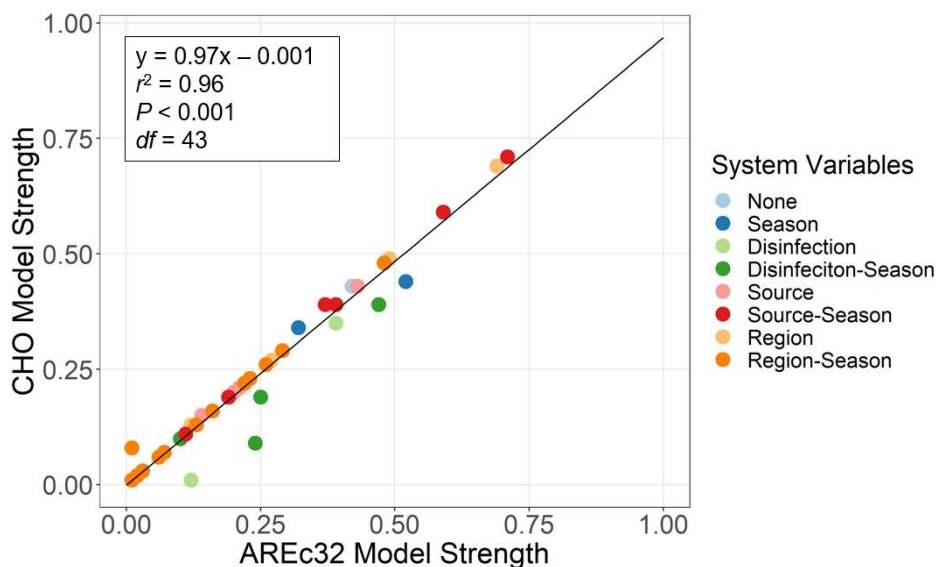

**Table S10: Regulated vs. Unregulated AREc32 Oxidative Stress Model Strengths**

| Group                | Variable | $r^2$ | $P$     | $df$ | Group          | Variable       | $r^2$  | $P$     | $df$  |
|----------------------|----------|-------|---------|------|----------------|----------------|--------|---------|-------|
| All                  | ~        | 0.42  | < 0.001 | 236  | ~Source-Season | LSW-W          | 0.71   | < 0.001 | 26    |
| ~Season              | W        | 0.52  | < 0.001 | 236  |                | LSW-S          | 0.59   | < 0.001 | 27    |
|                      | S        | 0.32  | < 0.001 | 236  |                | SSW-W          | 0.26   | 0.006   | 26    |
| ~Disinfection        | CL       | 0.12  | < 0.001 | 116  |                | SSW-S          | 0.19   | 0.016   | 28    |
|                      | CLM      | 0.39  | < 0.001 | 117  |                | MW-W           | < 0.01 | 0.931   | 26    |
| ~Source              | LSW      | 0.43  | < 0.001 | 55   |                | MW-S           | 0.39   | < 0.001 | 26    |
|                      | SSW      | 0.20  | < 0.001 | 56   |                | GW-W           | 0.37   | 0.003   | 21    |
|                      | MW       | 0.21  | < 0.001 | 54   |                | GW-S           | 0.11   | 0.094   | 24    |
|                      | GW       | 0.14  | 0.010   | 47   |                | ~Region-Season | EB-W   | 0.29    | 0.037 |
| ~Region              | EB       | 0.69  | < 0.001 | 26   |                |                | EB-S   | 0.13    | 0.248 |
|                      | SM       | 0.13  | 0.059   | 27   | SM-W           |                | 0.16   | 0.158   | 12    |
|                      | WV       | 0.27  | 0.004   | 27   | SM-S           |                | 0.01   | 0.714   | 13    |
|                      | YT       | 0.13  | 0.057   | 27   | WV-W           |                | 0.06   | 0.405   | 12    |
|                      | IR       | 0.22  | 0.014   | 25   | WV-S           |                | < 0.01 | 0.817   | 13    |
|                      | LA       | 0.49  | < 0.001 | 27   | YT-W           |                | 0.26   | 0.060   | 12    |
|                      | MC       | 0.12  | 0.081   | 26   | YT-S           |                | 0.22   | 0.075   | 13    |
|                      | MD       | 0.23  | 0.027   | 19   | IR-W           |                | < 0.01 | 0.833   | 11    |
| ~Disinfection-Season | CL-W     | 0.10  | 0.016   | 49   | IR-S           |                | 0.03   | 0.573   | 12    |
|                      | CL-S     | 0.24  | < 0.001 | 54   | LA-W           |                | 0.02   | 0.581   | 13    |
|                      | CLM-W    | 0.47  | < 0.001 | 55   | LA-S           |                | 0.23   | 0.080   | 12    |
|                      | CLM-S    | 0.25  | < 0.001 | 54   | MC-W           |                | < 0.01 | 0.887   | 11    |
|                      |          |       |         |      | MC-S           |                | 0.03   | 0.567   | 13    |
|                      |          |       |         |      | MD-W           | 0.07           | 0.448  | 8       |       |
|                      |          |       |         |      | MD-S           | 0.48           | 0.019  | 9       |       |



**Table S11: Regulated vs. Unregulated CHO Cytotoxicity Model Strengths**

| Group                | Variable | R <sup>2</sup> | P       | df  | Group          | Variable       | R <sup>2</sup> | P       | df    |
|----------------------|----------|----------------|---------|-----|----------------|----------------|----------------|---------|-------|
| All                  | ~        | 0.43           | < 0.001 | 236 | ~Source-Season | LSW-W          | 0.71           | < 0.001 | 26    |
| ~Season              | W        | 0.44           | < 0.001 | 236 |                | LSW-S          | 0.59           | < 0.001 | 27    |
|                      | S        | 0.34           | < 0.001 | 236 |                | SSW-W          | 0.26           | 0.006   | 26    |
| ~Disinfection        | CL       | < 0.01         | 0.289   | 116 |                | SSW-S          | 0.19           | 0.016   | 28    |
|                      | CLM      | 0.35           | < 0.001 | 117 |                | MW-W           | < 0.01         | 0.931   | 26    |
| ~Source              | LSW      | 0.43           | < 0.001 | 55  |                | MW-S           | 0.39           | < 0.001 | 26    |
|                      | SSW      | 0.20           | < 0.001 | 56  |                | GW-W           | 0.39           | 0.002   | 21    |
|                      | MW       | 0.21           | < 0.001 | 54  |                | GW-S           | 0.11           | 0.094   | 24    |
|                      | GW       | 0.15           | 0.006   | 47  |                | ~Region-Season | EB-W           | 0.29    | 0.037 |
| ~Region              | EB       | 0.69           | < 0.001 | 26  |                |                | EB-S           | 0.13    | 0.248 |
|                      | SM       | 0.13           | 0.059   | 27  | SM-W           |                | 0.16           | 0.158   | 12    |
|                      | WV       | 0.27           | 0.004   | 27  | SM-S           |                | 0.01           | 0.714   | 13    |
|                      | YT       | 0.13           | 0.057   | 27  | WV-W           |                | 0.06           | 0.405   | 12    |
|                      | IR       | 0.22           | 0.014   | 25  | WV-S           |                | < 0.01         | 0.817   | 13    |
|                      | LA       | 0.49           | < 0.001 | 27  | YT-W           |                | 0.26           | 0.060   | 12    |
|                      | MC       | 0.13           | 0.057   | 26  | YT-S           |                | 0.22           | 0.075   | 13    |
|                      | MD       | 0.23           | 0.027   | 19  | IR-W           |                | < 0.01         | 0.833   | 11    |
| ~Disinfection-Season | CL-W     | 0.10           | 0.014   | 49  | IR-S           |                | 0.03           | 0.573   | 12    |
|                      | CL-S     | 0.09           | 0.020   | 54  | LA-W           |                | 0.02           | 0.581   | 13    |
|                      | CLM-W    | 0.39           | < 0.001 | 55  | LA-S           |                | 0.23           | 0.080   | 12    |
|                      | CLM-S    | 0.19           | < 0.001 | 54  | MC-W           |                | 0.08           | 0.362   | 11    |
|                      |          |                |         |     | MC-S           |                | 0.03           | 0.567   | 13    |
|                      |          |                |         |     | MD-W           |                | 0.07           | 0.448   | 8     |
|                      |          |                |         |     | MD-S           |                | 0.48           | 0.019   | 9     |

**Figure S19: Regulated vs. Unregulated AREc32 Oxidative Stress by Source and Season**

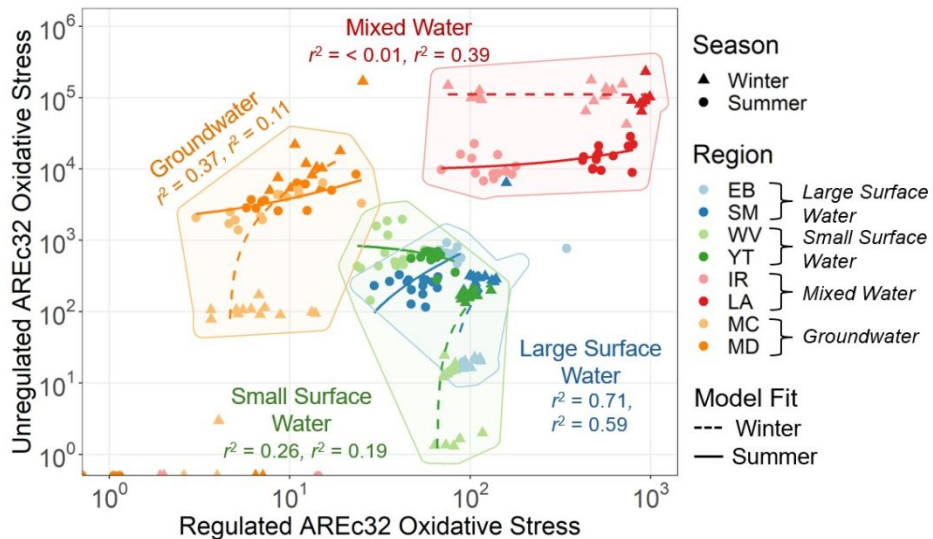

Section S3.7: Regulated vs. Unregulated AREc32 Oxidative Stress (Figures S20-S27)

Figure S20: Regulated vs. Unregulated AREc32 Oxidative Stress

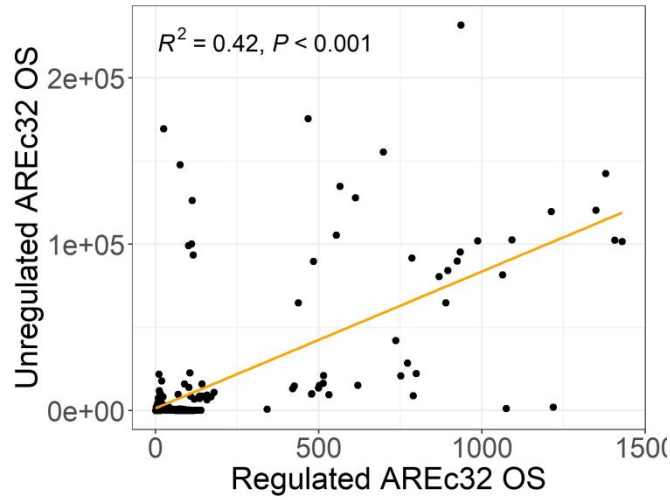

Figure S21: Regulated vs. Unregulated AREc32 Oxidative Stress by Season

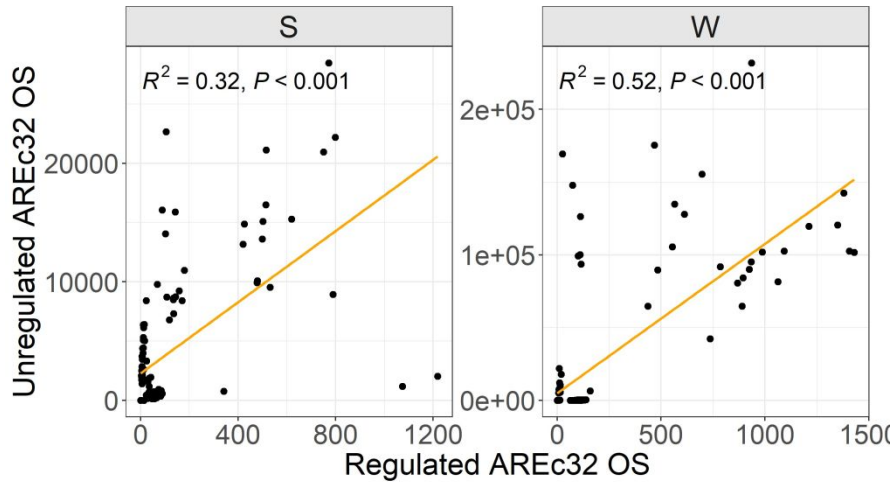

Figure S22: Regulated vs. Unregulated AREc32 Oxidative Stress by Disinfection Type

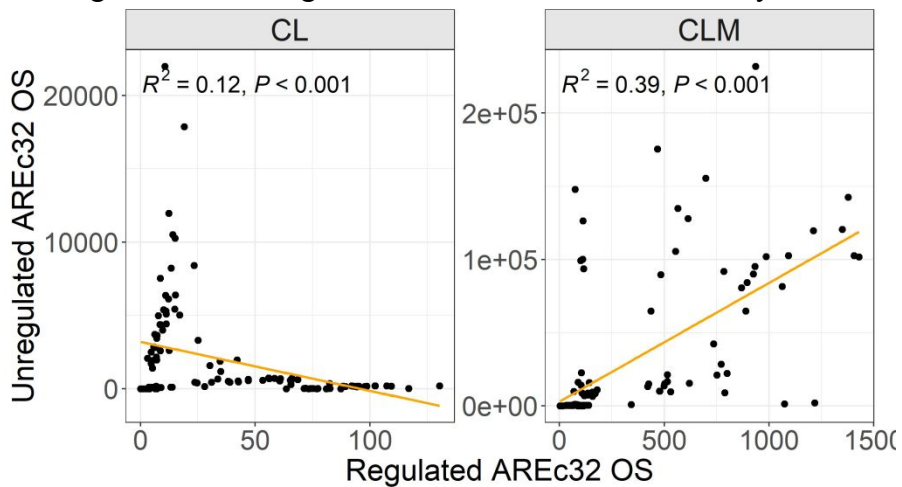

**Figure S23: Regulated vs. Unregulated AREc32 Oxidative Stress by Source Type**

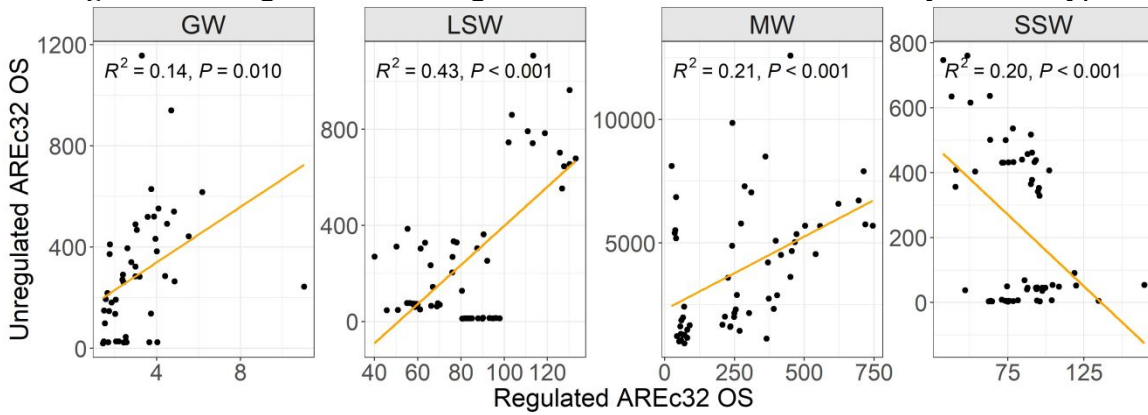

**Figure S24: Regulated vs. Unregulated AREc32 Oxidative Stress by Region**

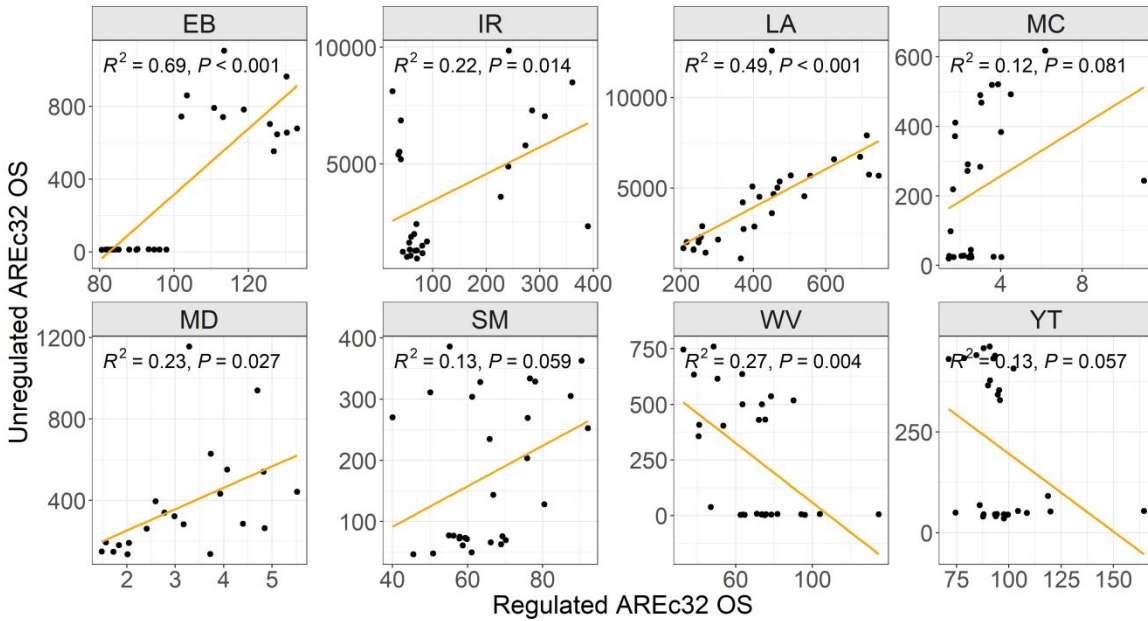

**Figure S25: Regulated vs. Unregulated AREc32 Oxidative Stress by Disinfection and Season**

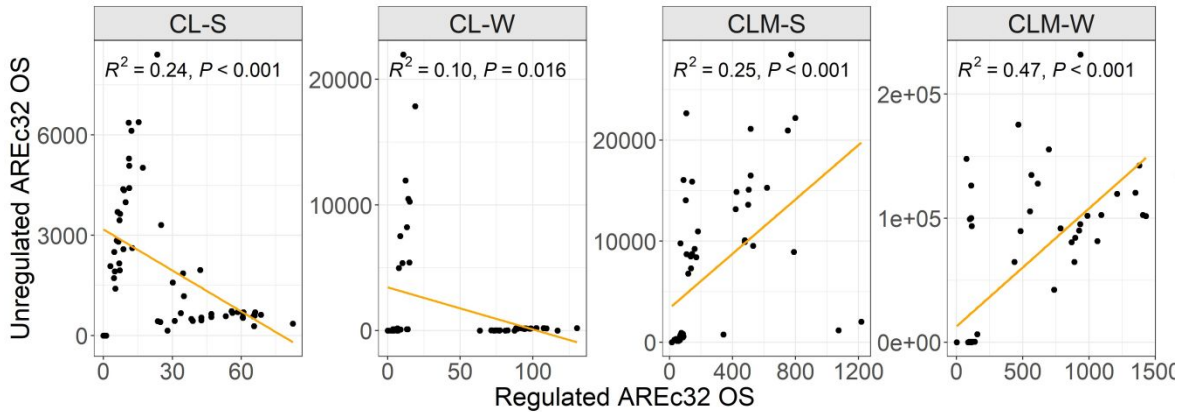

**Figure S26: Regulated vs. Unregulated AREc32 Oxidative Stress by Source and Season**

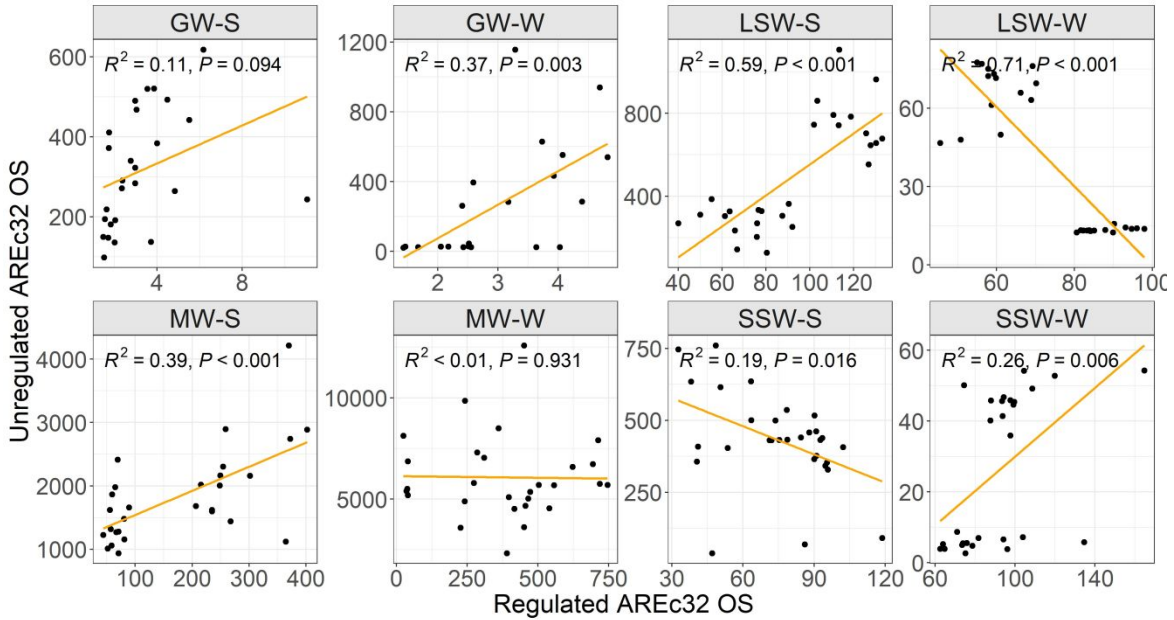

**Figure S27: Regulated vs. Unregulated AREc32 Oxidative Stress by Region and Season**

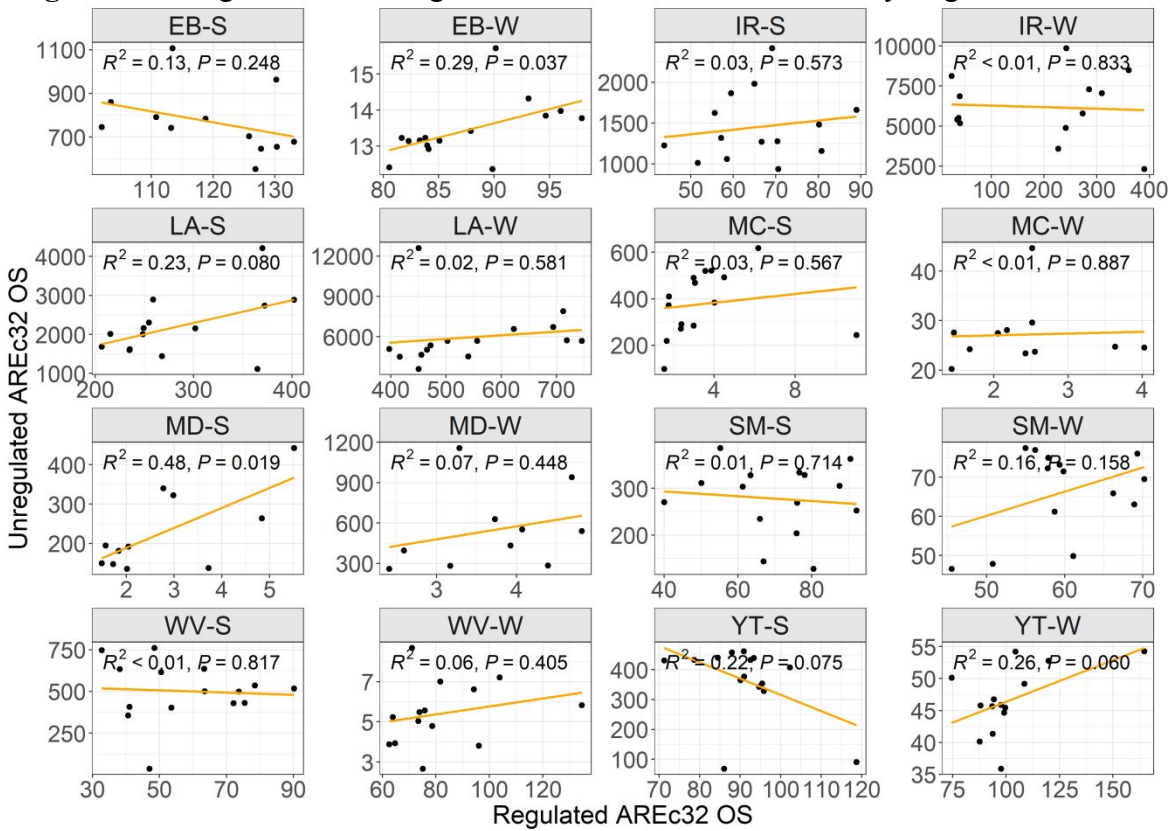

**Section S3.8:** Regulated vs. Unregulated CHO Cytotoxicity (Figures S28-S35)

**Figure S28:** Regulated vs. Unregulated CHO Cytotoxicity

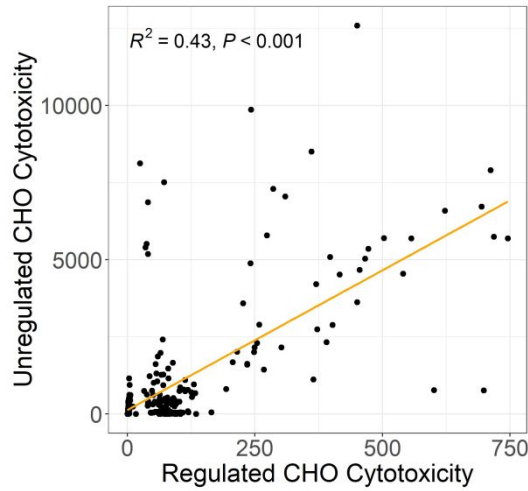

**Figure S29:** Regulated vs. Unregulated CHO Cytotoxicity by Season

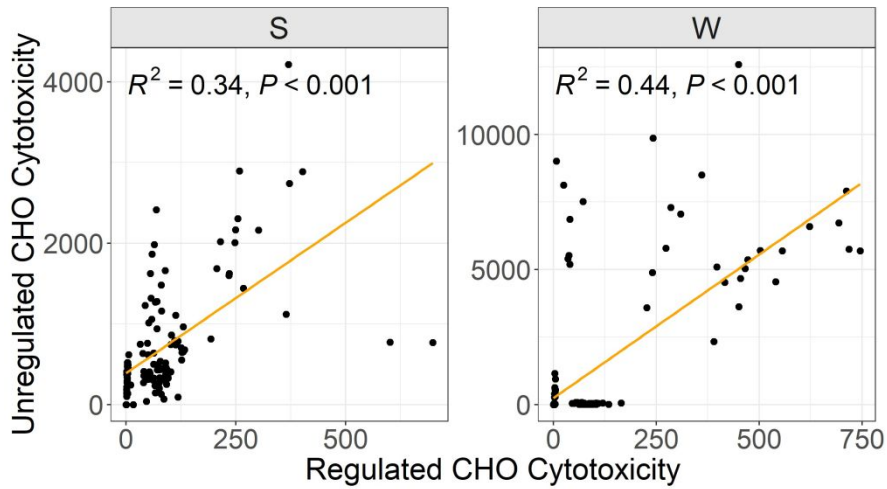

**Figure S30:** Regulated vs. Unregulated CHO Cytotoxicity by Disinfection Type

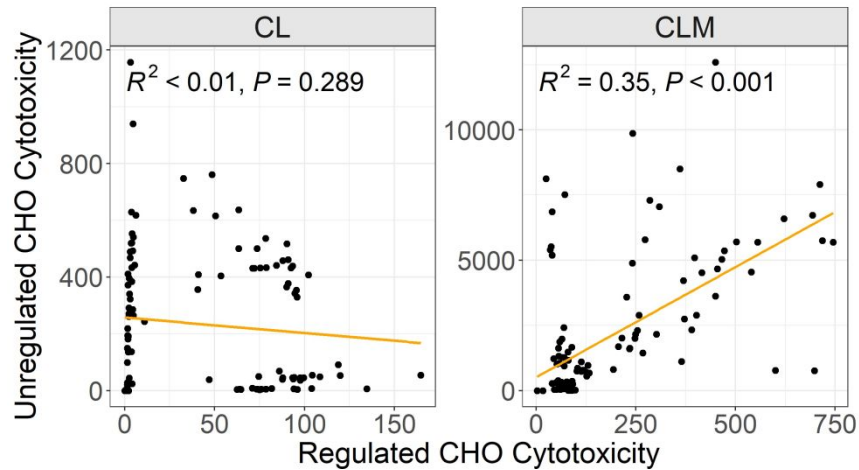

**Figure S31: Regulated vs. Unregulated CHO Cytotoxicity by Source Type**

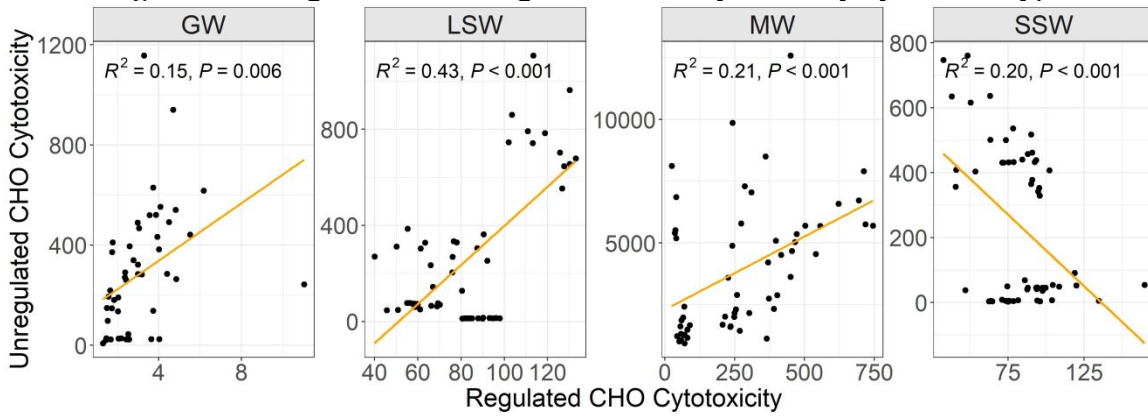

**Figure S32: Regulated vs. Unregulated CHO Cytotoxicity by Region**

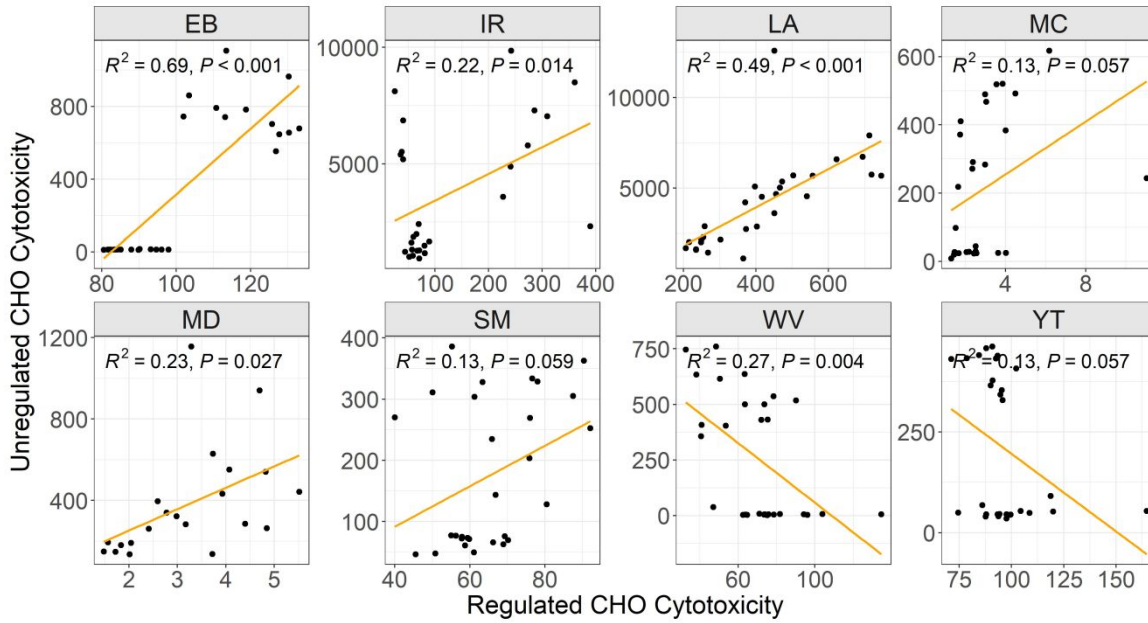

**Figure S33: Regulated vs. Unregulated CHO Cytotoxicity by Disinfection and Season**

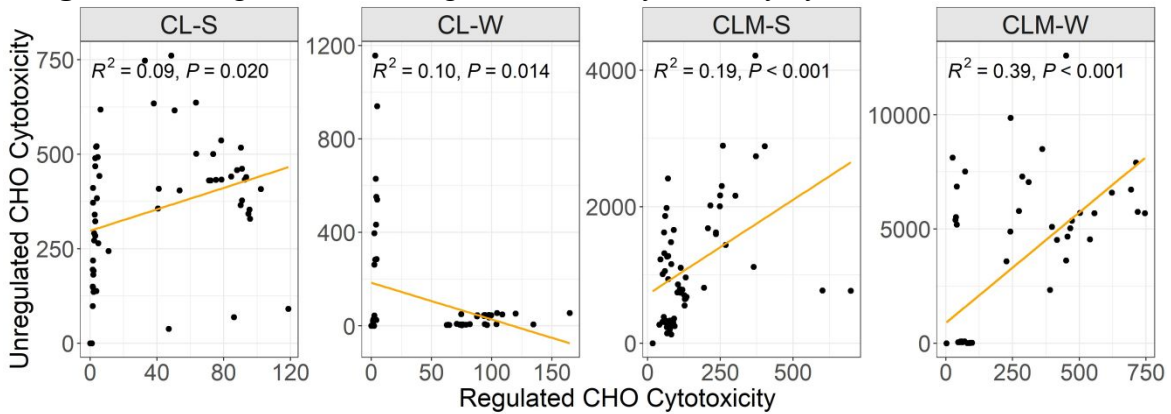

**Figure S34: Regulated vs. Unregulated CHO Cytotoxicity by Source and Season**

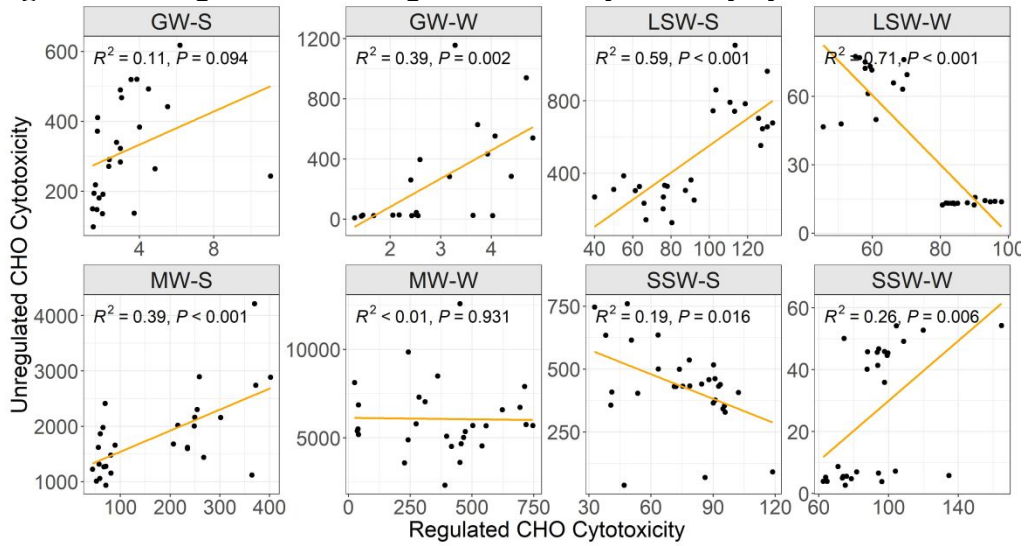

**Figure S35: Regulated vs. Unregulated CHO Cytotoxicity by Region and Season**

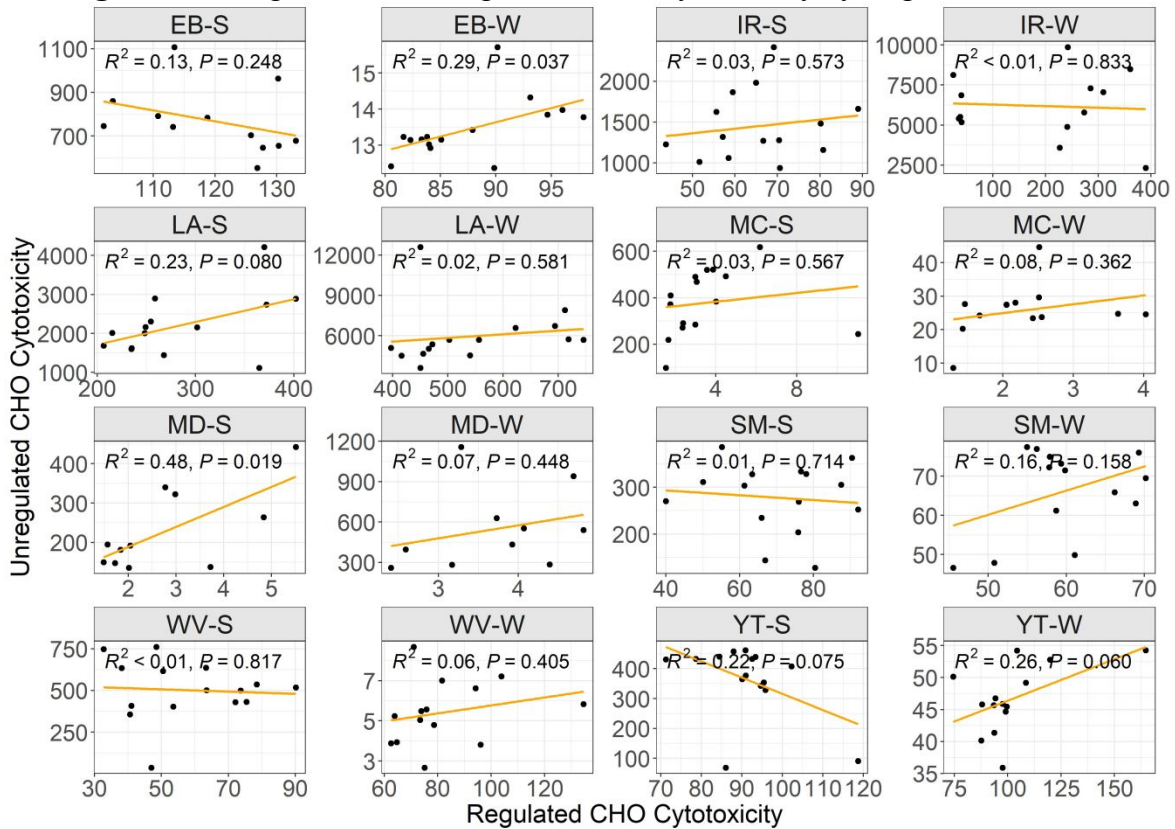

## References

- (1) USEPA. Analytical Methods Approved for Drinking Water Compliance Monitoring under the Disinfection Byproduct Rules. *U. S. Environ. Prot. Agency* **1995**, 28.
- (2) Hua, L.-C.; Kim, E.; McCurry, D. L.; Huang, C.; Mitch, W. A. Novel Chlorination Byproducts of Tryptophan: Initial High-Yield Transformation Products versus Small Molecule Disinfection Byproducts. *Environ. Sci. Technol. Lett.* **2020**, 7 (3), 149–155. <https://doi.org/10.1021/acs.estlett.0c00011>.
- (3) Wagner, E. D.; Plewa, M. J. CHO Cell Cytotoxicity and Genotoxicity Analyses of Disinfection By-Products: An Updated Review. *J. Environ. Sci.* **2017**, 58, 64–76. <https://doi.org/10.1016/j.jes.2017.04.021>.
- (4) Stalter, D.; O'Malley, E.; von Gunten, U.; Escher, B. I. Fingerprinting the Reactive Toxicity Pathways of 50 Drinking Water Disinfection By-Products. *Water Res.* **2016**, 91, 19–30. <https://doi.org/10.1016/j.watres.2015.12.047>.
- (5) USEPA. Determination of Haloacetic Acids and Dalapon in Drinking Water by Liquid-Liquid Microextraction, Derivatization, and Gas Chromatography with Electron Capture Detection, 2003. <https://nepis.epa.gov/Exe/ZyPDF.cgi/901V0400.PDF?Dockey=901V0400.PDF>.
- (6) Tuttle, M. L.; Grauch, R. I. *Salinization of the Upper Colorado River—Fingerprinting Geologic Salt Sources*; U.S. Geological Survey Scientific Investigations Report 2009–5072, 2009.
- (7) Li, X.-F.; Mitch, W. A. Drinking Water Disinfection Byproducts (DBPs) and Human Health Effects: Multidisciplinary Challenges and Opportunities. *Environ. Sci. Technol.* **2018**, 52 (4), 1681–1689. <https://doi.org/10.1021/acs.est.7b05440>.
- (8) Alexandrou, L.; Meehan, B. J.; Jones, O. A. H. Regulated and Emerging Disinfection By-Products in Recycled Waters. *Sci. Total Environ.* **2018**, 637, 1607–1616. <https://doi.org/10.1016/j.scitotenv.2018.04.391>.
- (9) Farré, M. J.; Gernjak, W. Disinfection Byproducts in Potable Reuse. In *Comprehensive Analytical Chemistry*; Elsevier, 2021; Vol. 92, pp 139–161. <https://doi.org/10.1016/bs.coac.2021.01.005>.
- (10) Allen, J. M.; Plewa, M. J.; Wagner, E. D.; Wei, X.; Bokenkamp, K.; Hur, K.; Jia, A.; Liberatore, H. K.; Lee, C.-F. T.; Shirkhani, R.; Krasner, S. W.; Richardson, S. D. Drivers of Disinfection Byproduct Cytotoxicity in U.S. Drinking Water: Should Other DBPs Be Considered for Regulation? *Environ. Sci. Technol.* **2022**, 56 (1), 392–402. <https://doi.org/10.1021/acs.est.1c07998>.
- (11) Bougeard, C. M. M.; Goslan, E. H.; Jefferson, B.; Parsons, S. A. Comparison of the Disinfection By-Product Formation Potential of Treated Waters Exposed to Chlorine and Monochloramine. *Water Res.* **2010**, 44 (3), 729–740. <https://doi.org/10.1016/j.watres.2009.10.008>.
- (12) Richardson, S. D. Disinfection By-Products: Formation and Occurrence in Drinking Water\*\*This Article Has Been Reviewed in Accordance with the US EPA's Peer and Administrative Review Policies and Approved for Publication. Mention of Trade Names or Commercial Products Does Not Constitute Endorsement or Recommendation for Use by the US EPA. In *Encyclopedia of Environmental Health*; Elsevier, 2011; pp 110–136. <https://doi.org/10.1016/B978-0-444-52272-6.00276-2>.



- (13) Richardson, S. D.; Plewa, M. J. To Regulate or Not to Regulate? What to Do with More Toxic Disinfection by-Products? *J. Environ. Chem. Eng.* **2020**, *8* (4), 103939. <https://doi.org/10.1016/j.jece.2020.103939>.
- (14) Plewa, M. J.; Simmons, J. E.; Richardson, S. D.; Wagner, E. D. Mammalian Cell Cytotoxicity and Genotoxicity of the Haloacetic Acids, A Major Class of Drinking Water Disinfection By-Products. *Environ. Mol. Mutagen.* **2010**, *51* (8–9), 871–878. <https://doi.org/10.1002/em.20585>.
